# Supplementary material for: A comprehensive investigation on the chemical diversity and efficacy of different parts of Ligusticum chuanxiong
Source: Royal Society of Chemistry journal article supplement (doi:10.1039/d1fo02811a), 2022-01-01
Supplement: d1fo02811a1.pdf [file d1fo02811a1.pdf]

## Supplementary Material

### A comprehensive investigation on chemical diversity and efficacy of different parts of *Ligusticum chuanxiong*

Hongling Yan<sup>a</sup>, Yinlin Zhou<sup>a</sup>, Fei Tang<sup>a</sup>, Chengjiu Wang<sup>a</sup>, Jing Wu<sup>a</sup>, Changjiang Hu<sup>a,b</sup>, Xiaofang Xie<sup>a\*</sup>, Cheng Peng<sup>a\*</sup>, Yuzhu Tan<sup>a\*</sup>

*a* Key Laboratory of Southwestern Chinese Medicine Resources, **Pharmacy College**, Chengdu University of Traditional Chinese Medicine, Chengdu 611137, China

*b* Key Laboratory of Quality Control and Efficacy Evaluation of Traditional Chinese Medicine Formula Granules, Sichuan New Green Medicine Science and Technology Development Co. Ltd., Pengzhou 611930, China

\* Co-corresponding author at: Key Laboratory of Southwestern Chinese Medicine Resources, **Pharmacy College**, Chengdu University of Traditional Chinese Medicine, Chengdu 611137, China. Tel.: +86 028-61800231. E-mail Address: [tanyuzhu@cdutcm.edu.cn](mailto:tanyuzhu@cdutcm.edu.cn) (Y.Z. Tan\*); [pengchengchengdu@126.com](mailto:pengchengchengdu@126.com) (C. Peng\*); [xxf14544@163.com](mailto:xxf14544@163.com) (X.F. Xie\*).

### Supplementary results

#### 1. Identification of other phthalides

##### 1.1 Identification of phthalide monomers

Peaks **46** and **51** presented similarly in its MS/MS spectrum a molecular ion at  $m/z$  189.10  $[M+H]^+$  and the followed by its fragments at  $m/z$  171.08  $[M+H-H_2O]^+$ , 153.07  $[M+H-2H_2O]^+$ , 143.09  $[M+H-H_2O-CO]^+$  and 117.07  $[M+H-CO_2-C_2H_4]^+$ , in which peak **51** was identified as *Z*-butyridenephthalide in comparison with the reference material. The peak **46** has shorter retention time than peak **51** and was deduced as *E*-butyridenephthalide<sup>1</sup>.

Peaks **38** and **40** produced molecular ions at  $m/z$  193.12  $[M+H]^+$  and the higher intensity fragment ion at  $m/z$  137.06 which was came from the losing of  $C_4H_8$  and indicated the presence of 3-butyl substitution. Peak **38** was identified as senkyunolide A by reference components and literature data comparison<sup>2,3</sup>, while peak **40** was preliminarily identified as 3-butyl-5,6-dihydro-4H-isobenzofuran-1-one by internal database.

A total of four peaks (peaks **10**, **42**, **45** and **49**) were extracted by molecular ion at  $m/z$  195.14  $[M+H]^+$ , and all of them generated the highest characteristic fragment ion at  $m/z$  149.13  $[M+H-H_2O-CO]^+$ . Four candidate structures were found by internal database search, including 3-carboxyethyl-phthalide (hydroxyl phthalide), cnidilide, neocnidilide and isocnidilide. Peak **10**, whose retention time was significantly shorter than other peaks, was identified as 3-carboxyethyl-phthalide (hydroxyl phthalide). Peaks **42**, **45** and **49** were tentatively identified as neocnidilide, cnidilide or isocnidilide<sup>1,3</sup>.

Peak **55** with the molecular ion at  $m/z$  197.15  $[M+H]^+$  and further produced the fragment ions at  $m/z$  179.14 and  $m/z$  151.15, corresponding to the neutral losses of  $H_2O$  and  $CO$ . According to search in internal database, it was matched with 3-butylhexahydro-1(3H)-isobenzofuranone.

The four isomers (peaks **26**, **30**, **33** and **35**) exhibited molecular ion at  $m/z$  205.09  $[M+H]^+$ . Among them, peaks **30** and **33** were precisely identified as senkyunolide C and 4-hydroxy-butyridenephthalide by reference materials, which both generated the product ions at  $m/z$  187.08  $[M+H-H_2O]^+$ , 169.06  $[M+H-2H_2O]^+$  and 159.08  $[M+H-H_2O-CO]^+$ . Peak **26** produced the fragment ions at  $m/z$  149.06  $[M+H-CH_3CHCO]^+$  and 103.05  $[M+H-C_3H_6O-CO_2]^+$ , indicating that the structure of peak **26** might contains 9-OH substitution, and compared with reference material was identified as senkyunolide E. Peak **35** has the same MS<sup>2</sup> fragment as peaks **30** and **33**, but the retention time was longer. By the internal database, it was identified as 7-OH substituted *Z*-butyridenephthalide, known as senkyunolide B.

Peaks **16**, **21**, **23**, **28** and **29** were five isomers with the molecular ion at  $m/z$  207.10  $[M+H]^+$ . The retention time and mass spectrum fragments of peak **23** were consistent with the standard substance senkyunolide F, which was confidently identified as senkyunolide F. The molecular ion of peak **29** has the highest intensity, and further

generated the fragment ion at  $m/z$  165.09  $[M+H-H_2O-CO]^+$ . Those mass spectrum characteristic was consistent with literature data, hence peak **29** was inferred as 6,7-exoxyligustilide<sup>4</sup>. Peak **16** has a shorter retention time than other peaks, and without fragmentation ion at  $m/z$  151.04. It was speculated that the hydroxyl group substitution might be in the side chain, and peak **16** was vaguely identified as 3-(3-Hydroxybutyl)-1(3H)-isobenzofuranone. Peaks **21** and **28** produced the fragment ions at  $m/z$  161.10  $([M+H-H_2O-CO]^+)$  and 151.04  $([M+H-C_4H_8]^+)$ , corresponding to 3-butyl substitution, so the hydroxyl group substituted hydrogen on the benzene ring. Searching in the internal database, peaks **21** and **28** were identified as 5-hydroxy-3-butylphthalide and 4-hydroxy-3-butylphthalide.

Peaks **20**, **22** and **25** all presented a molecular ion at  $m/z$  209.12  $[M+H]^+$ . Peaks **20** and **22** produced product ions at  $m/z$  191.11  $([M+H-H_2O]^+)$ , 163.11  $([M+H-H_2O-CO]^+)$ , 153.05  $([M+H-C_4H_8]^+)$  and 145.10  $([M+H-2H_2O-CO]^+)$ . The exact mass and the neutral loss of  $C_4H_8$  provided a demonstration the existence of 3-butyl group and the same time a hydroxyl group attached to the ring (Table S3). Their most main difference was the intensity of fragment ion at  $m/z$  153.05, in which peak **20** exhibited higher intensity than peak **22**. Combining the alternative structure, we surmised that there may be a 3-OH in the structure of peak **20**, which was more conducive to the formation of  $C^+$  ion after the removal of  $C_4H_8$ . The above results were similarly to the characteristics of mass spectrum fragments of senkyunolide K and senkyunolide G in the literature, so we identified peaks **20** and **22** as senkyunolide K and senkyunolide G, respectively<sup>2</sup>. Peak **25** was 2H more than 6,7-exoxyligustilide, which could be observed from their mass difference in their precursor ions and product ions, and was tentatively inferred as (4Z)-4-butylidenehexahydrooxireno[*e*]isobenzofuran-6(1aH)-one by internal database.

Three isomers (peaks **5**, **13** and **15**) with the same molecular formula of  $C_{12}H_{18}O_3$  exhibited precursor ion at  $m/z$  211.13  $[M+H]^+$ . Among them, peak **5** was identified as (3S,3aR,10R)-(-)-10-hydroxysedanolid by comparing with the MS/MS spectrum of reference material. Different from peak **5**, the  $m/z$  119.09 fragment ion appeared in peaks **13** and **15**, which was caused by the neutral loss of  $2H_2O$  and  $C_4H_8$ , indicating that the hydroxyl substitution occurred in the six-membered ring. Combining with the retention time of peaks **13** and **15** and the candidate structures in the internal database, we tentatively labeled them as (3S,3aR,4R)-4-hydroxy-sedanolid and (3S,3aR,6S)-6-hydroxy-sedanolid respectively.

The peak **43** with molecular ion at  $m/z$  219.10  $[M+H]^+$ , which was 30 Da more than Z-butenylphthalide, and it was speculated that there was an additional  $OCH_3$  substitution. The further fragment ion at  $m/z$  204.08  $[M+H-CH_3]^+$ , 186.07  $[M+H-H_2O-CH_3]^+$  and 158.07  $[M+H-H_2O-CO-CH_3]^+$  were related to the loss of  $CH_3$  radical, so it is speculated that  $OCH_3$  substitution might be in the benzene ring. The speculated structure was searched in SciFinder, and four potential structures were found, among which only (3Z)-3-butylidene-4-methoxy-1(3H)-isobenzofuranone came from natural products and was preliminarily matched with peak **43**.

Five isomers (Peaks **3**, **6**, **12**, **18** and **19**) produced the molecular ion at  $m/z$  223.10  $[M+H]^+$  shown its theoretical molecular formula were  $C_{12}H_{14}O_2$ . Peak **19** exhibited the fragment ion at  $m/z$  177.05  $([M+H-H_2O-C_2H_4]^+)$ , 135.04  $([M+H-H_2O-C_4H_6O]^+)$ , and 117.07  $([M+H-2H_2O-C_4H_6O]^+)$  was identified as senkyunolide D<sup>3,6</sup>. Peaks **12** and **18** both provided the fragment ion at  $m/z$  149.02  $([M+H-H_2O-C_4H_8]^+)$ , inferred that the possession of 3-butyl substitution. Based on the internal database, peaks **12** and **18** were ambiguously identified as 3-butyl-4,7-dihydroxyphthalide or 3-butyl-6,7-dihydroxyphthalide. Peaks **3** and **6** both appeared the fragment ion at  $m/z$  205.09  $([M+H-H_2O]^+)$  and  $m/z$  149.06  $([M+H-H_2O-CO-C_2H_4]^+)$ , inferring that there might contain 3-butenyl group. According to the internal database, peaks **3** and **6** were ambiguously identified as (3Z)-3-butylidene-4,5-dihydro-4,5-dihydroxy-1(3H)-isobenzofuranone or (3Z)-3-butylidene-4,5-dihydro-6,7-dihydroxy-1(3H)-isobenzofuranone.

Peaks **1**, **2** and **8** produced the same mass spectrometry fragments, including molecular ion at  $m/z$  227.13  $([M+H]^+)$ , and product ions at  $m/z$  209.12  $([M+H-H_2O]^+)$  and 153.05  $([M+H-H_2O-C_4H_8]^+)$ , which were consistent with the mass spectrum characteristics of senkyunolide J/N reported in the literature<sup>5</sup>. So peak **1**, **2** and **8** were unambiguously identified as senkyunolide J, senkyunolide N or their steric isomer chuanxiongolid R2.

Peaks **11** and **27** both were found the molecular ion at  $m/z$  237.08  $[M+H]^+$ . According to the structural characteristics of the phthalides, they were presumed to be butenylphthalide with three hydroxyl substitutions. A further fragment ion at  $m/z$  191.03  $([M+H-H_2O-C_2H_4]^+)$  implied that all three hydroxyl substituents are on the benzene ring. A candidate component, (Z)-3-butylidene-4,5,6-trihydroxy-1(3H)-isobenzofuranone was found in SciFinder based on the speculated structure. Therefore, peaks **11** and **27** were tentatively identified as (Z)-3-butylidene-4,5,6-trihydroxy-1(3H)-isobenzofuranone and (E)-3-butylidene-4,5,6-trihydroxy-1(3H)-isobenzofuranone.

Peak **14** has a formula of  $C_{13}H_{16}O_4$  ( $m/z$  237.11  $[M+H]^+$ ), was identified as (+)-(R)-3-butyl-7-hydroxy-3-methoxyphthalide matched in internal database. The fragment ion at  $m/z$  205.09  $([M+H-CH_3OH]^+)$  was produced by *r*-H rearrangement of H-8 and removal of  $CH_3OH$ , and further generated the fragment ion at  $m/z$  177.09  $([M+H-CH_3OH-CO]^+)$  and 163.04  $([M+H-CH_3OH-C_3H_6]^+)$ .

Peak **7** with precursor ion at  $m/z$  239.09  $[M+H]^+$ , exhibited major fragment ions at  $m/z$  203.07  $([M+H-H_2O]^+)$ , 179.03  $([M+H-H_2O-C_3H_6]^+)$ , and 165.02  $([M+H-C_4H_8]^+)$ . Based on the aforementioned information and internal

database, peak **7** was tentatively assigned as (3*R*)-3-butyl-3,6,7-trihydroxy-1(3*H*)-isobenzofuranone.

Peak **32** produced molecular ion at 243.08 [M+H]<sup>+</sup> corresponding to the molecular formula C<sub>12</sub>H<sub>15</sub>O<sub>3</sub>Cl and only one compound with this molecular formula was found in the internal database, known as senkyunolide L. The MS/MS fragment ion at *m/z* 207.10 was generated from the neutral loss of HCl, and the product ions produced by further fragmentation were consistent with that of 6,7-exoxyligustilide, including fragment ions at *m/z* 189.09, 161.10, 119.09, et al. Therefore, peak **32** was deduced as senkyunolide L<sup>5</sup>.

Three isomers (peaks **31**, **34** and **36**) generated precursor ion at *m/z* 279.16 [M+H]<sup>+</sup>, which suggested that their molecular formula were C<sub>16</sub>H<sub>22</sub>O<sub>4</sub>, and speculated that their structures maybe contain a hydroxyl and a methoxyl substituent according to the structural characteristics of phthalides (Table S3). Among them, peaks **31** and **34** appeared a characteristic fragment at *m/z* 191.11, which produced by the neutral loss of H<sub>2</sub>O and C<sub>4</sub>H<sub>6</sub>O. In addition, other common fragments were observed, such as *m/z* 233.15 ([M+H-H<sub>2</sub>O-CO])<sup>+</sup>, 145.10 [191-H<sub>2</sub>O-CO]<sup>+</sup> and 117.07 [191-H<sub>2</sub>O-CO-C<sub>2</sub>H<sub>4</sub>]<sup>+</sup>, which were consistent with the mass spectrum characteristics of senkyunolide M/Q reported in the literature<sup>1,6</sup>. Since the peaks **31** and **34** were provisionally assigned as senkyunolide M or senkyunolide Q. While peak **36** also has those common fragments above but no the characteristic fragment at *m/z* 191.11, it was suggested that the position of double bond at peak **36** was differed from peaks **31** and **34**. We speculated that there is a 6,7-alkene that prevents further disconnection of 6-COC<sub>3</sub>H<sub>7</sub> and 7-OH. There is no compound with this structure in SciFinder, therefore, peak **36** was a potential new compound, named as 3-butyl-4,5-dihydro-7-hydroxy-6-(1-oxobutyl)-1(3*H*)-isobenzofuranone.

The peak **37** produced a precursor ion at *m/z* 177.09 [M+H]<sup>+</sup>, which was 14 Da less than ligustilide, and came into being the neutral lost fragments of H<sub>2</sub>O and CO as same as Z-ligustilide. Hence, we speculated that peak **37** was a demethylated ligustilide, assigned as (Z)-propylidene phthalide by internal database. Similarly, the formulas for peak **17** (C<sub>11</sub>H<sub>14</sub>O<sub>2</sub>, *m/z* 179.11) and **24** (C<sub>11</sub>H<sub>16</sub>O<sub>2</sub>, *m/z* 181.12) were one methylene (14 Da) less than those for senkyunolide A and neocnidilide, respectively, and resulting in corresponding neutral loss of H<sub>2</sub>O and CO. So peaks **17** and **24** were provisionally identified as (3*Z*)-4,5,6,7-tetrahydro-3-propylidene-1(3*H*)-isobenzofuranone and (3*R*,3*aR*)-3*a*,4,5,6-tetrahydro-3-propyl-1(3*H*)-isobenzofuranone respectively, the structures could be searched in SciFinder.

## 1.2 Identification of phthalide dimers

Peak **70** presented precursor ions at *m/z* 379.19 [M+H]<sup>+</sup> and *m/z* 396.22 [M+NH<sub>4</sub>]<sup>+</sup> and was exactly assigned as 4,5-dehydroligustilide by comparison with the retention time and mass spectrometry of the reference material.

There were 12 isomers (peaks **59**, **60**, **66**, **71**, **73**, **74**, **78**, **81**, **83**, **84**, **86** and **91**) owning molecular ion at *m/z* 381.20 [M+H]<sup>+</sup> and all of them presented the characteristic ion at *m/z* 191.11 with highest abundance, suggesting that their structure formed by the polymerization of two ligustilide. Among them, peaks **74**, **78**, **83** and **91** were identified as levistolide A, (3*Z*)-(3*aR*,6*S*,3'*R*,8*S*)-3*a*.8'.6.3'-diligustilide, tokiaerialide and Z,Z'-3.3'a,7.7'a-diligustilide according to reference materials. The retention time of peaks **71** and **73** was close to that of peak **74**, so it was speculated that they were stereoisomers with the same polymerization mode. Combining with the literature data, they were tentatively identified as levistolide B and senkyunolide O<sup>4</sup>. Peak **84** has the close retention time and almost same mass spectrum fragment behavior compared with peak **83**, suggesting that peak **84** is the stereoisomer of peak **83**, a potential new compound, named as Cl-1. The retention time of peak **86** was between peak **84** (3*a*.8',7*a*.3') and peak **91** (3*a*.7*a*',7*a*.3*a*'), according to above mentioned structure retention relationship of candidate compounds, it was tentatively assigned to neodiligustilide (3*a*.3',7*a*.8'). Similarly, peak **81** was identified as tokinolide A (3*a*.7',7*a*.6'). The other three peaks **59**, **60** and **66**, have shorter retention time and were tentatively matched to riligustilide, Z,Z'-3.3',8.8'-diligustilide and angelicolide, which could not be accurately identified due to the lack of reference materials.

Peaks **57**, **61**, **62**, **63**, **65**, **75**, **77**, **80**, **82** and **87** produced the molecular ions at *m/z* 383.22, and the DPLs at *m/z* 191.11 and 193.12, suggested that they were ten isomers and all combined by the polymerization of Z-ligustilide and senkyunolide A. Except for peak **87**, the other nine peaks showed the highest intensity fragment ions at *m/z* 191.11. In the current literature, only five phthalide dimers in accordance with above exact mass were reported with clear absolute configurations in plants of umbelliferae, i.e., chuanxiongdiolide R6, chaxiongdiolide F, (Z)-3,8-dihydro-6,6',7,3'a-diligustilide, 3,8-dihydro-levistolide A and senkyunolide P. Unfortunately, as the reference material in this study, chuanxiongdiolide R6 was not detected in any part of L. *chuanxiong*. Peaks **61** and **65** presented a higher response, which were putatively identified as (Z)-3,8-dihydro-6,6',7,3'a-diligustilide and senkyunolide P based on the literature data, respectively<sup>7</sup>. The characteristic ion at *m/z* 191.11 in peak **87** was a non-base peak ion as same as reference substance chuanxiongdiolide R6. It was speculated that peak **87** has a relatively stable structure and may be the trans-isomer of chuanxiongdiolide R6 (3*a*.3*a*',7*a*.7*a*'), that was, it has the polymerization mode of 3*a*.7*a*',7*a*.3*a*', was named as DI-6. The MS/MS spectrum of peak **62** was consistent with peak **61**, was identified as 3,8-dihydro-levistolide A<sup>5</sup>, the stereoisomer of (Z)-3,8-dihydro-6,6',7,3'a-diligustilide. Peak **82** produced a product ion at *m/z* 225.16 [M+H-C<sub>6</sub>H<sub>8</sub>O<sub>2</sub>-H<sub>2</sub>O-CO]<sup>+</sup>, corresponding the neutral loss of C<sub>6</sub>H<sub>8</sub>O<sub>2</sub> in

Z-ligustilide and H<sub>2</sub>O and CO in senkyunolide A. It was deduced that the form of polymerization was 3a.7',7a.6', and was provisionally identified as chaxiongnode F<sup>4</sup>. The rest 5 peaks (**57**, **63**, **75**, **77** and **80**) have no candidate structure to assign, were potential new compounds, named as DI-1~5.

Peak **68** presented a precursor ion at  $m/z$  395.19 [M+H]<sup>+</sup>, which was 16 Da (O) more than 4,5-dehydrodigustilide. The MS/MS spectrum showed dominant product ions at  $m/z$  191.11 [M+H-C<sub>12</sub>H<sub>12</sub>O<sub>3</sub>]<sup>+</sup> and 205.09 [M+H-C<sub>12</sub>H<sub>14</sub>O<sub>2</sub>]<sup>+</sup>, corresponding to the depolymerization of the phthalide dimer in the MS/MS spectra. Thus, it was inferred that its structure type is BII (Table S4). So far, no compound with similar structure has been reported, so it was speculated that this is a potential new compound, named as BII-1.

Two isomers (peaks **50** and **56**) have a molecular ion at  $m/z$  397.20 [M+H]<sup>+</sup>, which were presumed to be the monomer polymerization of a Z-ligustilide and a hydroxy-substituted Z-ligustilide (Table S4). Among them, peak **50** provided the highest intensity fragment ion at  $m/z$  191.11, and further product ions at  $m/z$  173.10 [191.11-H<sub>2</sub>O]<sup>+</sup> and 145.10 [191.11-H<sub>2</sub>O-CO]<sup>+</sup>, corresponding to the structural fragment of Z-ligustilide. In accordance with accurate mass and structure feature were reported in the literature, peak **50** was identified as chuanxiongnode A/B<sup>8</sup>. The another compound provided more fragment ions at  $m/z$  361.18 [M+H-2H<sub>2</sub>O]<sup>+</sup>, 307.17 [M+H-2H<sub>2</sub>O-CO-C<sub>2</sub>H<sub>2</sub>]<sup>+</sup> and 253.12 [M+H-2H<sub>2</sub>O-CO-C<sub>2</sub>H<sub>2</sub>-C<sub>4</sub>H<sub>6</sub>]<sup>+</sup>, and was considered to be different linking pattern between the monomers. Based on the neutral loss of C<sub>2</sub>H<sub>2</sub> and C<sub>4</sub>H<sub>6</sub>, which formed by the undergo RDA cleavage of two six-membered rings, it was speculated that peak **56** is a potential new compound with the polymerization sites of 3.7',8.6', named as CII-1.

The phthalide dimer with molecular formula C<sub>24</sub>H<sub>30</sub>O<sub>5</sub> has two types of monomer binding, DII and CV (Table S4). In this experiment, four isomers, including peaks **53**, **54**, **64** and **76**, were found to have this molecular ion at  $m/z$  399.22 [M+H]<sup>+</sup> based on the mass spectrum fragment information. Compared with the other two peaks, peaks **53** and **54** have shorter retention time and stronger abundance of fragment ions at  $m/z$  335.20 ([M+H-HCOOH]<sup>+</sup>), which were considered as CV type. Peaks **64** and **76** were considered as DII type on the contrary. The fragment ions and its intensity generated by peak **54** were consistent with that of levistolide A (CI), including  $m/z$  381.20 [M+H-H<sub>2</sub>O]<sup>+</sup>, 353.21 [M+H-H<sub>2</sub>O-CO]<sup>+</sup> and 191.11 [M+H-C<sub>12</sub>H<sub>16</sub>O<sub>3</sub>]<sup>+</sup>, etc. Therefore, it was speculated that of peak **54** has the same polymerization mode as levistolide A. Combining with literature data<sup>1</sup>, peak **54** was accurately identified as demethylwallichilide. The rest three compounds might be potential new compounds because no candidate structures have been found in internal database. Peak **53** produced product ions at  $m/z$  363.18 [M+H-2H<sub>2</sub>O]<sup>+</sup>, 309.18 [M+H-2H<sub>2</sub>O-CO-C<sub>2</sub>H<sub>2</sub>]<sup>+</sup>, and 253.12 [M+H-2H<sub>2</sub>O-CO-C<sub>2</sub>H<sub>2</sub>-C<sub>4</sub>H<sub>6</sub>]<sup>+</sup>, which neutral lost was similarly to the MS/MS spectrum of peak **56**, suggesting that they had the same polymerization mode, assigned as CV-1. Except to the DPI at  $m/z$  191.11, the characteristic ion at  $m/z$  207.10 was also found in peak **64**, corresponding to a hydroxyl phthalide fragment, which further proved that it was the structural type of DII. Peak **64** was labeled as DII-1. However, due to the limited reference materials, it was not possible to further infer the connection mode between the two monomers and the position of substituents. The mass spectrogram of peak **76** was also inconsistent with peak **64**, indicating differences in the monomer polymerization mode or the position of substituents. Peak **76** was labeled as DII-2.

Peak **79** provided the quasi-molecular ion at  $m/z$  401.23 [M+H]<sup>+</sup>, and was more than 16 Da than chuanxiongdilide R5. In addition, peak **79** presented the highest intensity fragment ion at  $m/z$  191.11, a Z-ligustilide fragment, suggesting that its monomer polymerization type was EII (Table S4). Two candidate structures were matched from an internal database based on molecular formula retrieval. Interestingly, both of candidate structures were FII types, which were different from peak **79**. What's more, the retention time of F-type phthalide dimer is usually shorter than that of E-type phthalide dimer, while the retention time of peak **79** was longer than that of peak **58** (EI), which was obviously unreasonable to consider as FII type. Therefore, peak **79** was identified as a potential new compound with the EII structure type, labeled as EII-1.

Peaks **69** and **72** were extracted from the TIC chromatogram of QC sample corresponding to the molecular ion at  $m/z$  413.23 [M+H]<sup>+</sup>. They both produced high intensity fragment ions at  $m/z$  191.11 [M+H-C<sub>13</sub>H<sub>19</sub>O<sub>3</sub>]<sup>+</sup> and  $m/z$  223.13 [M+H-C<sub>12</sub>H<sub>15</sub>O<sub>2</sub>]<sup>+</sup>, corresponding to the depolymerization of the phthalide dimer in the MS/MS spectra. Meanwhile, the peak **72** produced more product ions at  $m/z$  353.17 [M+H-CH<sub>3</sub>COOH]<sup>+</sup>, 307.17 [M+H-CH<sub>3</sub>COOH-H<sub>2</sub>O-CO]<sup>+</sup> and 251.11 [M+H-CH<sub>3</sub>COOH-H<sub>2</sub>O-CO-C<sub>4</sub>H<sub>8</sub>]. They were presumed to be a pair of isomers of CIV type with different monomer polymerization method (Tab. S4). Among them, peak **69** showed higher response signal and was temporarily identified as wallichilide<sup>1</sup>, while peak **72** was accurately identified as methyl ester derived from angeolide by comparing with the MS/MS spectra and retention time of reference material.

Peaks **39**, **47** and **52** presented the molecular ions at  $m/z$  415.21 [M+H]<sup>+</sup> and 432.24 [M+NH<sub>4</sub>]<sup>+</sup>, corresponding to a molecular formula of C<sub>24</sub>H<sub>30</sub>O<sub>6</sub>. In addition, they provided the DPIs at  $m/z$  191.11 or 193.12, corresponding to the depolymerization of the phthalide dimer, as well as the highest intensity fragment ion at  $m/z$  119.09 [193.12-C<sub>4</sub>H<sub>8</sub>-H<sub>2</sub>O]<sup>+</sup>, corresponding to a product ion of senkyunolide A. According to the structural features and molecular formula of the phthalide dimer, they were inferred to be DIII type (Table S4). A candidate compound, chuanxiongnode L5<sup>9</sup>, was matched from the internal database. Due to the lack of reference material and more

detailed MS/MS data, it was difficult to identify them more accurately. Peaks **39**, **47** and **52** were deduced as chuanxiongnolide L5 or its isomers.

#### Reference:

- 1 Q. Zhang, M. Wang, Q. Wang, H. Zhao, Z. Zhang, H. Yu, Y. Liu, S. Fu, Z. Lu, Z. Huang, Z. Xie, X. Gao and Y. Qiao, Characterization of the potential new phthalides in *Ligusticum chuanxiong* Hort. using ultra-performance liquid chromatography coupled with quadrupole time of flight tandem mass spectrometry. *J Sep Sci*, 2017, **40**, 2123–2130.
- 2 S. L. Li, S. S. Chan, G. Lin, L. Ling, R. Yan, H. S. Chung and Y. K. Tam, Simultaneous analysis of seventeen chemical ingredients of *Ligusticum chuanxiong* by on-line high performance liquid chromatography-diode array detector-mass spectrometry. *Planta Med*, 2003, **69**, 445–451.
- 3 A. Zuo, L. Wang, H. Xiao, L. Li, Y. Liu and J. Yi, Identification of the absorbed components and metabolites in rat plasma after oral administration of *Rhizoma Chuanxiong* decoction by HPLC-ESI-MS/MS. *J Pharm Biomed Anal*, 2011, **56**, 1046–1056.
- 4 Q. Zhang, M. Huo, Y. Zhang, Y. Qiao and X. Gao, A strategy to improve the identification reliability of the chemical constituents by high-resolution mass spectrometry-based isomer structure prediction combined with a quantitative structure retention relationship analysis: Phthalide compounds in *Chuanxiong* as a test case. *J Chromatogr A*, 2018, **1552**, 17–28.
- 5 J. Liu, M. Wang, L. Chen, Y. Li, Y. Chen, Z. Wei, Z. Jia, W. Xu and H. Xiao, Profiling the constituents of *Dachuanxiong* decoction by liquid chromatography with high-resolution tandem mass spectrometry using target and nontarget data mining. *J Sep Sci*, 2019, **42**, 2202–2213.
- 6 X. Chen, Z. Lou, H. Zhang, G. Tan, Z. Liu, W. Li, Z. Zhu and Y. Chai, Identification of multiple components in *Guanxinling* injection using hydrophilic interaction liquid chromatography/time-of-flight mass spectrometry and reversed-phase liquid chromatography/time-of-flight mass spectrometry. *Rapid Commun Mass Spectrom*, 2011, **25**, 1661–1674.
- 7 X. L. Zhang, L. F. Liu, L. Y. Zhu, Y. J. Bai, Q. Mao, S. L. Li, S. L. Chen and H. X. Xu, A high performance liquid chromatography fingerprinting and ultra high performance liquid chromatography coupled with quadrupole time-of-flight mass spectrometry chemical profiling approach to rapidly find characteristic chemical markers for quality evaluation of dispensing granules, a case study on *Chuanxiong Rhizoma*. *J Pharm Biomed Anal*, 2014, **88**, 391–400.
- 8 Y. H. Li, S. L. Peng, Y. Zhou, K. B. Yu and L. S. Ding, Two new phthalides from *Ligusticum chuanxiong*. *Planta Med*, 2006, **72**, 652–656.
- 9 W. Wei, X. W. Wu and X. W. Yang, Novel phthalide derivatives from the rhizomes of *Ligusticum chuanxiong* and their inhibitory effect against lipopolysaccharide-induced nitric oxide production in RAW 264.7 macrophage cells. *RSC Adv*, 2016, **6**, 61037–61046.

#### Supplementary Figures

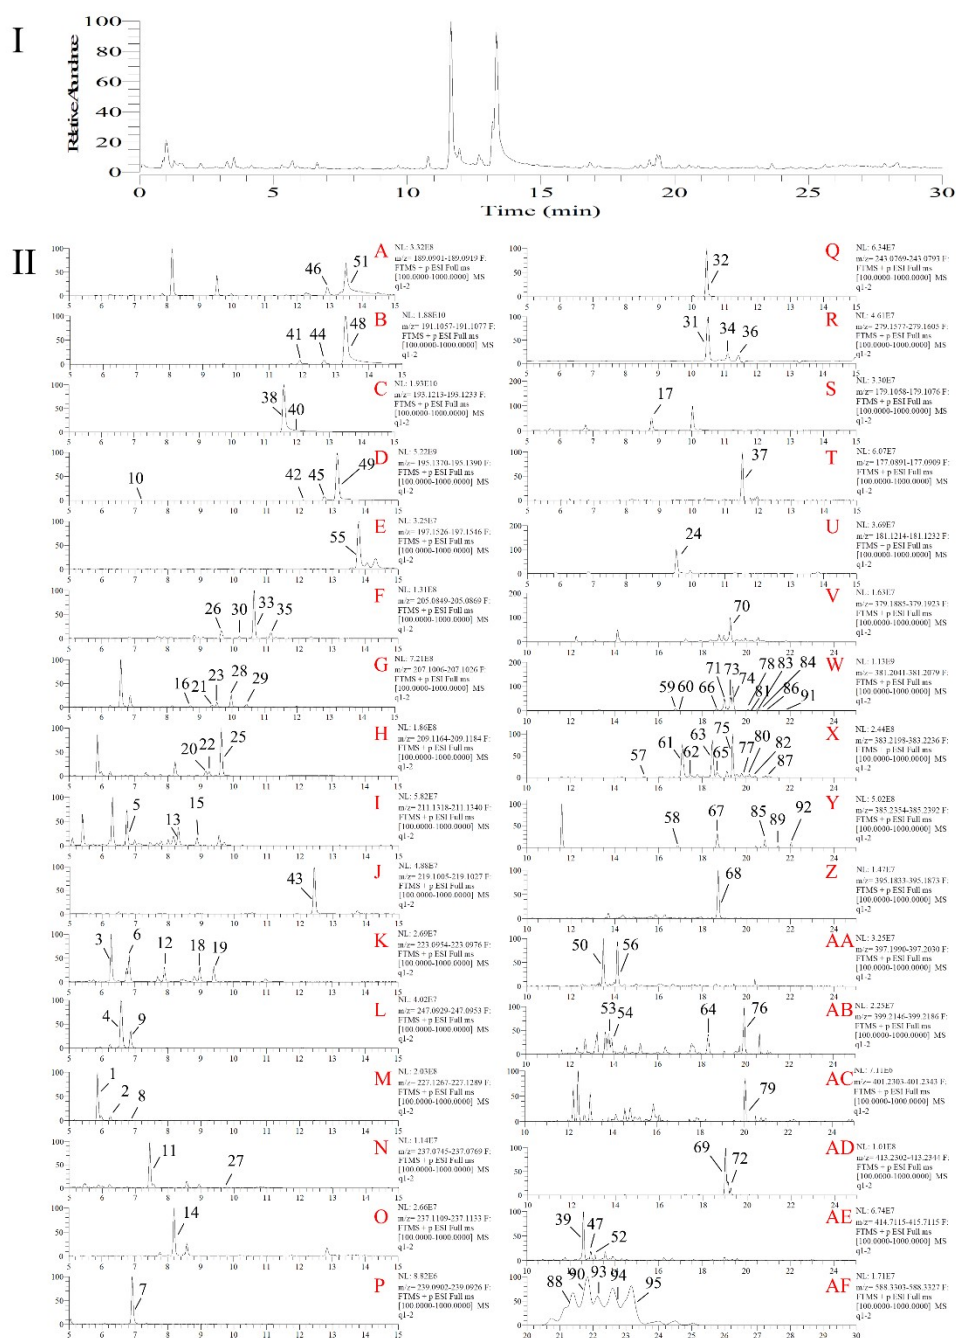

**Fig. S1** In the positive ion mode, the TIC chromatogram of QC sample by UHPLC/Q-Orbitrap MS Analysis (I) and EIC chromatogram of each compound (II).

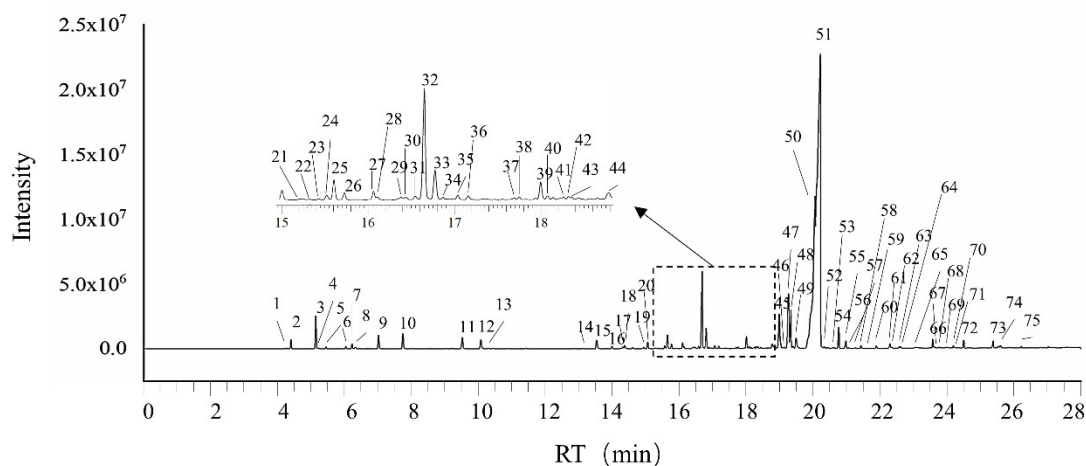

**Fig. S2** Assignment of the identified peaks in GC-MS TIC chromatograms in QC sample of volatile oil

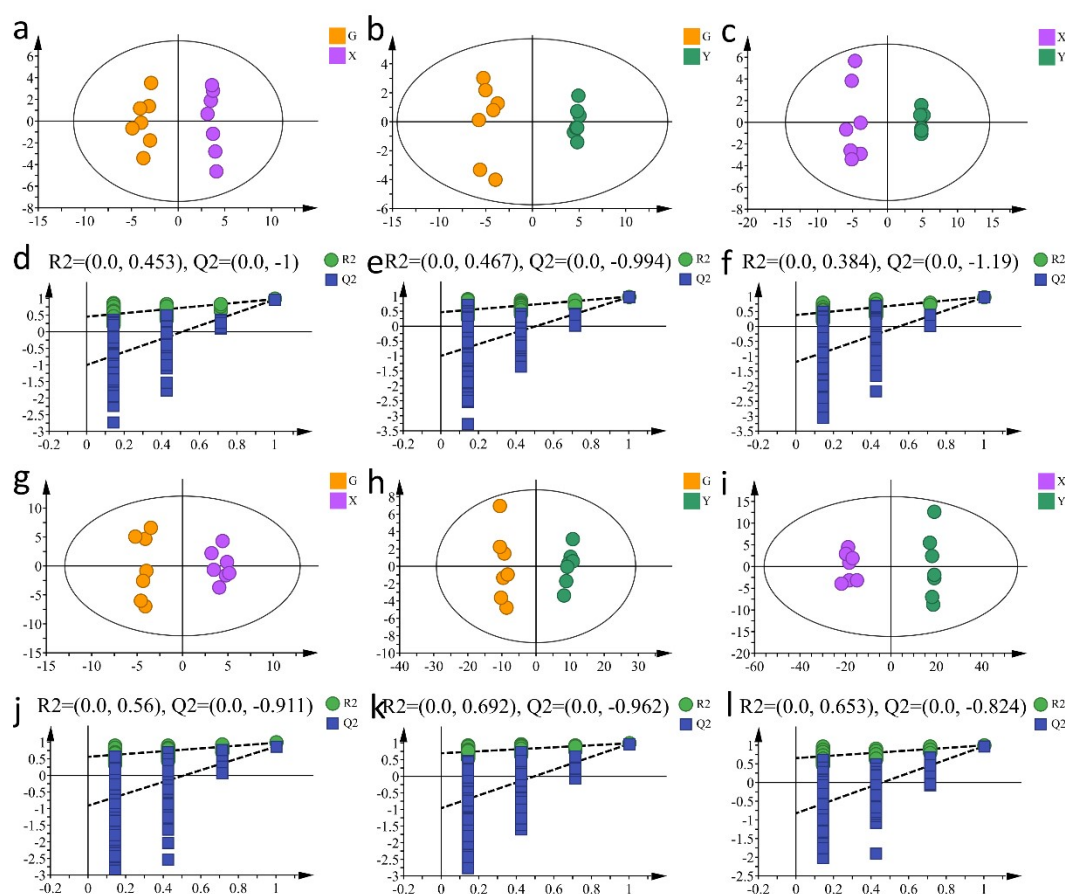

**Fig. S3** Score scatter plots and validation plots of OPLS-DA for volatile oil and methanol extract from three parts of CX. OPLS-DA for X/G, Y/G and Y/X comparative groups of volatile oil, respectively (a-c). Validation plots of OPLS-DA for X/G, Y/G and Y/X comparative groups of volatile oil, respectively (d-f). OPLS-DA for X/G, Y/G and Y/X comparative groups of methanol extract, respectively (g-i). Validation plots of OPLS-DA for X/G, Y/G and Y/X.

## Supplementary Tables

**Table S1** All compounds were characterized in different parts of CX by UHPLC/Q-Orbitrap MS Analysis

| No. | RT [min] | Identification         | Formula                                                       | Theoretical Mass (Da)          | Calculated Mass (Da)           | Error (ppm) | Class                   | X vs. G | Y vs. G |
|-----|----------|------------------------|---------------------------------------------------------------|--------------------------------|--------------------------------|-------------|-------------------------|---------|---------|
| 1   | 0.826    | DL-lysine              | C <sub>6</sub> H <sub>14</sub> N <sub>2</sub> O <sub>2</sub>  | 147.1128<br>[M+H] <sup>+</sup> | 147.1127<br>[M+H] <sup>+</sup> | -0.71       | amino acids             | ↓       | -       |
| 2   | 0.837    | L-histidine            | C <sub>6</sub> H <sub>9</sub> N <sub>3</sub> O <sub>2</sub>   | 156.0768<br>[M+H] <sup>+</sup> | 156.0766<br>[M+H] <sup>+</sup> | -0.98       | amino acids             | -       | -       |
| 3   | 0.859    | DL-arginine            | C <sub>6</sub> H <sub>14</sub> N <sub>4</sub> O <sub>2</sub>  | 175.1190<br>[M+H] <sup>+</sup> | 175.1188<br>[M+H] <sup>+</sup> | -0.87       | amino acids             | ↓       | ↓***    |
| 4   | 0.887    | choline                | C <sub>5</sub> H <sub>13</sub> NO                             | 104.1070<br>[M+H] <sup>+</sup> | 104.1073<br>[M+H] <sup>+</sup> | 2.972       | alkaloids               | -       | -       |
| 5   | 0.897    | D-(-)-glutamine        | C <sub>5</sub> H <sub>10</sub> N <sub>2</sub> O <sub>3</sub>  | 147.0764<br>[M+H] <sup>+</sup> | 147.0761<br>[M+H] <sup>+</sup> | -2.17       | amino acids             | -       | -       |
| 6   | 0.9      | asparagine             | C <sub>4</sub> H <sub>8</sub> N <sub>2</sub> O <sub>3</sub>   | 133.0608<br>[M+H] <sup>+</sup> | 133.0606<br>[M+H] <sup>+</sup> | -1.27       | amino acids             | -       | ↓***    |
| 7   | 0.902    | threonine              | C <sub>4</sub> H <sub>9</sub> NO <sub>3</sub>                 | 120.0655<br>[M+H] <sup>+</sup> | 120.0655<br>[M+H] <sup>+</sup> | -0.16       | amino acids             | -       | ↓***    |
| 8   | 0.908    | gluconic acid          | C <sub>6</sub> H <sub>12</sub> O <sub>7</sub>                 | 195.0499<br>[M-H] <sup>-</sup> | 195.0504<br>[M-H] <sup>-</sup> | 2.414       | saccharides             | ↓**     | ↓***    |
| 9   | 0.908    | D-raffinose            | C <sub>18</sub> H <sub>32</sub> O <sub>16</sub>               | 503.1607<br>[M-H] <sup>-</sup> | 503.1619<br>[M-H] <sup>-</sup> | 2.462       | saccharides             | -       | -       |
| 10  | 0.913    | nystose                | C <sub>24</sub> H <sub>42</sub> O <sub>21</sub>               | 665.2135<br>[M-H] <sup>-</sup> | 665.2151<br>[M-H] <sup>-</sup> | 2.429       | saccharides             | -       | ↓***    |
| 11  | 0.918    | α,α-trehalose          | C <sub>12</sub> H <sub>22</sub> O <sub>11</sub>               | 341.1078<br>[M-H] <sup>-</sup> | 341.1086<br>[M-H] <sup>-</sup> | 2.234       | saccharides             | -       | -       |
| 12  | 0.928    | D-(-)-quinic acid      | C <sub>7</sub> H <sub>12</sub> O <sub>6</sub>                 | 193.0707<br>[M+H] <sup>+</sup> | 193.0705<br>[M+H] <sup>+</sup> | -0.85       | others                  | -       | -       |
| 13  | 0.929    | D-(-)-fructose         | C <sub>6</sub> H <sub>12</sub> O <sub>6</sub>                 | 179.0550<br>[M-H] <sup>-</sup> | 179.0554<br>[M-H] <sup>-</sup> | 2.234       | saccharides             | -       | ↑***    |
| 14  | 0.944    | cytidine               | C <sub>9</sub> H <sub>13</sub> N <sub>3</sub> O <sub>5</sub>  | 244.0928<br>[M+H] <sup>+</sup> | 244.0925<br>[M+H] <sup>+</sup> | -1.22       | nucleosides             | -       | ↓***    |
| 15  | 0.957    | adenine                | C <sub>5</sub> H <sub>5</sub> N <sub>5</sub>                  | 136.0618<br>[M+H] <sup>+</sup> | 136.0616<br>[M+H] <sup>+</sup> | -1.26       | amino acids             | -       | -       |
| 16  | 0.964    | adenosine              | C <sub>10</sub> H <sub>13</sub> N <sub>5</sub> O <sub>4</sub> | 268.1040<br>[M+H] <sup>+</sup> | 268.1037<br>[M+H] <sup>+</sup> | -1.23       | nucleosides             | -       | ↓***    |
| 17  | 0.967    | pipecolic acid         | C <sub>6</sub> H <sub>11</sub> NO <sub>2</sub>                | 130.0863<br>[M+H] <sup>+</sup> | 130.0865<br>[M+H] <sup>+</sup> | 1.882       | alkaloids               | -       | -       |
| 18  | 0.971    | citric acid            | C <sub>6</sub> H <sub>8</sub> O <sub>7</sub>                  | 191.0186<br>[M-H] <sup>-</sup> | 191.0193<br>[M-H] <sup>-</sup> | 3.513       | short-chain fatty acids | -       | ↓***    |
| 19  | 0.975    | trans-aconitic acid    | C <sub>6</sub> H <sub>6</sub> O <sub>6</sub>                  | 173.0081<br>[M-H] <sup>-</sup> | 173.0083<br>[M-H] <sup>-</sup> | 1.362       | short-chain fatty acids | -       | ↓***    |
| 20  | 0.976    | 2-hydroxyphenylalanine | C <sub>9</sub> H <sub>11</sub> NO <sub>3</sub>                | 182.0812<br>[M+H] <sup>+</sup> | 182.0809<br>[M+H] <sup>+</sup> | -1.48       | amino acids             | -       | -       |
| 21  | 0.984    | shikimic acid          | C <sub>7</sub> H <sub>10</sub> O <sub>5</sub>                 | 173.0444<br>[M-H] <sup>-</sup> | 173.045<br>[M-H] <sup>-</sup>  | 3.179       | short-chain fatty acids | -       | ↑***    |
| 22  | 1.013    | 4-oxoproline           | C <sub>5</sub> H <sub>7</sub> NO <sub>3</sub>                 | 130.0499<br>[M+H] <sup>+</sup> | 130.0498<br>[M+H] <sup>+</sup> | -0.54       | nucleosides             | ↓***    | -       |
| 23  | 1.211    | uridine                | C <sub>9</sub> H <sub>12</sub> N <sub>2</sub> O <sub>6</sub>  | 245.0768<br>[M+H] <sup>+</sup> | 245.0763<br>[M+H] <sup>+</sup> | -2.09       | nucleosides             | -       | -       |
| 24  | 1.212    | nicotinic acid         | C <sub>6</sub> H <sub>5</sub> NO <sub>2</sub>                 | 124.0393<br>[M+H] <sup>+</sup> | 124.0394<br>[M+H] <sup>+</sup> | 0.766       | alkaloids               | -       | -       |
| 25  | 1.218    | isocitric acid         | C <sub>6</sub> H <sub>8</sub> O <sub>7</sub>                  | 191.0186<br>[M-H] <sup>-</sup> | 191.0192<br>[M-H] <sup>-</sup> | 2.989       | short-chain fatty acids | -       | ↓***    |
| 26  | 1.236    | cis-aconitic acid      | C <sub>6</sub> H <sub>6</sub> O <sub>6</sub>                  | 173.0081<br>[M+H] <sup>+</sup> | 173.008<br>[M+H] <sup>+</sup>  | -0.37       | short-chain fatty acids | -       | ↓***    |
| 27  | 1.257    | 2'-deoxyadenosine      | C <sub>10</sub> H <sub>13</sub> N <sub>5</sub> O <sub>3</sub> | 252.1091<br>[M+H] <sup>+</sup> | 252.109<br>[M+H] <sup>+</sup>  | -0.46       | nucleosides             | -       | -       |
| 28  | 1.291    | DL-norleucine          | C <sub>6</sub> H <sub>13</sub> NO <sub>2</sub>                | 132.1019<br>[M+H] <sup>+</sup> | 132.1018<br>[M+H] <sup>+</sup> | -0.8        | amino acids             | ↓**     | ↓       |
| 29  | 1.293    | guanine                | C <sub>5</sub> H <sub>5</sub> N <sub>5</sub> O                | 152.0567<br>[M+H] <sup>+</sup> | 152.0565<br>[M+H] <sup>+</sup> | -1.23       | nucleosides             | -       | -       |
| 30  | 1.295    | guanosine              | C <sub>10</sub> H <sub>13</sub> N <sub>5</sub> O <sub>5</sub> | 284.0989<br>[M+H] <sup>+</sup> | 284.0986<br>[M+H] <sup>+</sup> | -1.21       | nucleosides             | -       | -       |
| 31  | 1.308    | 2-hydroxycinnamic acid | C <sub>9</sub> H <sub>8</sub> O <sub>3</sub>                  | 165.0546<br>[M+H] <sup>+</sup> | 165.0545<br>[M+H] <sup>+</sup> | -0.73       | phenolic acids          | -       | -       |
| 32  | 1.496    | isoleucine             | C <sub>6</sub> H <sub>13</sub> NO <sub>2</sub>                | 132.1019                       | 132.1016                       | -2.31       | amino acids             | -       | -       |

|    |       |                                                                                                          |                                                                 | [M+H] <sup>+</sup>             | [M+H] <sup>+</sup>             |       |                               |      |      |
|----|-------|----------------------------------------------------------------------------------------------------------|-----------------------------------------------------------------|--------------------------------|--------------------------------|-------|-------------------------------|------|------|
| 33 | 1.542 | 2'-O-methyladenosine                                                                                     | C <sub>11</sub> H <sub>15</sub> N <sub>5</sub> O <sub>4</sub>   | 282.1197<br>[M+H] <sup>+</sup> | 282.1193<br>[M+H] <sup>+</sup> | -1.35 | nucleosides                   | -    | -    |
| 34 | 1.595 | valylproline                                                                                             | C <sub>10</sub> H <sub>18</sub> N <sub>2</sub> O <sub>3</sub>   | 215.1390<br>[M+H] <sup>+</sup> | 215.1389<br>[M+H] <sup>+</sup> | -0.55 | amino acids                   | ↓**  | ↓*** |
| 35 | 1.685 | 2'-O-methylguanosine                                                                                     | C <sub>11</sub> H <sub>15</sub> N <sub>5</sub> O <sub>5</sub>   | 298.1146<br>[M+H] <sup>+</sup> | 298.1141<br>[M+H] <sup>+</sup> | -1.66 | nucleosides                   | -    | ↓*** |
| 36 | 1.833 | 5-(hydroxymethyl)-4-methoxy-2,5-dihydrofuran-2-one                                                       | C <sub>6</sub> H <sub>8</sub> O <sub>4</sub>                    | 145.0495<br>[M+H] <sup>+</sup> | 145.0494<br>[M+H] <sup>+</sup> | -0.93 | others                        | ↑*   | ↑*** |
| 37 | 1.885 | thymine                                                                                                  | C <sub>5</sub> H <sub>6</sub> N <sub>2</sub> O <sub>2</sub>     | 127.0502<br>[M+H] <sup>+</sup> | 127.0503<br>[M+H] <sup>+</sup> | 0.756 | nucleosides                   | ↓*** | -    |
| 38 | 2.202 | L-phenylalanine                                                                                          | C <sub>9</sub> H <sub>11</sub> NO <sub>2</sub>                  | 166.0863<br>[M+H] <sup>+</sup> | 166.086<br>[M+H] <sup>+</sup>  | -1.54 | amino acids                   | -    | -    |
| 39 | 2.288 | pantothenic acid                                                                                         | C <sub>9</sub> H <sub>17</sub> NO <sub>5</sub>                  | 220.1179<br>[M+H] <sup>+</sup> | 220.1176<br>[M+H] <sup>+</sup> | -1.59 | alkaloids                     | -    | -    |
| 40 | 2.713 | protocatechuic acid                                                                                      | C <sub>7</sub> H <sub>6</sub> O <sub>4</sub>                    | 153.0182<br>[M-H] <sup>-</sup> | 153.0185<br>[M-H] <sup>-</sup> | 1.731 | aromatic acids and its esters | -    | ↑*** |
| 41 | 2.74  | glycyl-L-leucine                                                                                         | C <sub>8</sub> H <sub>16</sub> N <sub>2</sub> O <sub>3</sub>    | 189.1234<br>[M+H] <sup>+</sup> | 189.1232<br>[M+H] <sup>+</sup> | -0.89 | amino acids                   | ↓*** | ↓*** |
| 42 | 2.806 | neochlorogenic acid                                                                                      | C <sub>16</sub> H <sub>18</sub> O <sub>9</sub>                  | 355.1024<br>[M+H] <sup>+</sup> | 355.1017<br>[M+H] <sup>+</sup> | -1.85 | phenylethanoid glycosides     | ↑*** | ↑*** |
| 43 | 2.825 | pyrpgallol                                                                                               | C <sub>6</sub> H <sub>6</sub> O <sub>3</sub>                    | 127.0390<br>[M+H] <sup>+</sup> | 127.0389<br>[M+H] <sup>+</sup> | -0.56 | short-chain fatty acids       | -    | ↑    |
| 44 | 2.85  | 5'-S-methyl-5'-thioadenosine                                                                             | C <sub>11</sub> H <sub>15</sub> N <sub>5</sub> O <sub>3</sub> S | 298.0968<br>[M+H] <sup>+</sup> | 298.0966<br>[M+H] <sup>+</sup> | -0.79 | alkaloids                     | ↑*** | ↑*** |
| 45 | 3.027 | leucylproline                                                                                            | C <sub>11</sub> H <sub>20</sub> N <sub>2</sub> O <sub>3</sub>   | 229.1547<br>[M+H] <sup>+</sup> | 229.1544<br>[M+H] <sup>+</sup> | -1.17 | amino acids                   | ↓**  | ↓*** |
| 46 | 3.046 | esculin                                                                                                  | C <sub>15</sub> H <sub>16</sub> O <sub>9</sub>                  | 341.0867<br>[M+H] <sup>+</sup> | 341.0864<br>[M+H] <sup>+</sup> | -0.9  | coumarins                     | -    | ↑*** |
| 47 | 3.048 | 3-O-(β-D-glucopyranosyl)-caffeoyl quinic acid                                                            | C <sub>22</sub> H <sub>28</sub> O <sub>14</sub>                 | 517.1552<br>[M+H] <sup>+</sup> | 517.1553<br>[M+H] <sup>+</sup> | 0.228 | phenylethanoid glycosides     | ↑    | -    |
| 48 | 3.122 | 2,3,5,6-tetramethylpyrazine                                                                              | C <sub>8</sub> H <sub>12</sub> N <sub>2</sub>                   | 137.1073<br>[M+H] <sup>+</sup> | 137.1072<br>[M+H] <sup>+</sup> | -0.91 | alkaloids                     | ↓    | ↓*** |
| 49 | 3.126 | (3aR,4aS,5R,7aS,8S,9aR)-5-hydroxy-4a,8-dimethyl-3-methyleneoctahydroazuleno[6,5-b]furan-2,6(3H,4H)-dione | C <sub>15</sub> H <sub>20</sub> O <sub>4</sub>                  | 265.1434<br>[M+H] <sup>+</sup> | 265.1432<br>[M+H] <sup>+</sup> | -0.89 | others                        | -    | -    |
| 50 | 3.224 | L-tryptophan                                                                                             | C <sub>11</sub> H <sub>12</sub> N <sub>2</sub> O <sub>2</sub>   | 205.0972<br>[M+H] <sup>+</sup> | 205.097<br>[M+H] <sup>+</sup>  | -0.75 | amino acids                   | -    | -    |
| 51 | 3.226 | 4-indolecarbaldehyde                                                                                     | C <sub>9</sub> H <sub>7</sub> NO                                | 146.0600<br>[M+H] <sup>+</sup> | 146.0599<br>[M+H] <sup>+</sup> | -0.96 | alkaloids                     | -    | -    |
| 52 | 3.227 | indole-3-acrylic acid                                                                                    | C <sub>11</sub> H <sub>9</sub> NO <sub>2</sub>                  | 188.0706<br>[M+H] <sup>+</sup> | 188.0704<br>[M+H] <sup>+</sup> | -1.09 | short-chain fatty acids       | -    | -    |
| 53 | 3.469 | caffeic acid                                                                                             | C <sub>9</sub> H <sub>8</sub> O <sub>4</sub>                    | 181.0495<br>[M+H] <sup>+</sup> | 181.0492<br>[M+H] <sup>+</sup> | -1.85 | phenolic acids                | ↑*** | ↑*** |
| 54 | 3.47  | chlorogenic acid                                                                                         | C <sub>16</sub> H <sub>18</sub> O <sub>9</sub>                  | 355.1024<br>[M+H] <sup>+</sup> | 355.1014<br>[M+H] <sup>+</sup> | -2.7  | phenylethanoid glycosides     | ↑*** | ↑*** |
| 55 | 3.507 | 2,5-dihydroxybenzaldehyde                                                                                | C <sub>7</sub> H <sub>6</sub> O <sub>3</sub>                    | 139.0390<br>[M+H] <sup>+</sup> | 139.0389<br>[M+H] <sup>+</sup> | -0.51 | phenolic acids                | -    | ↑*** |
| 56 | 3.54  | 7-hydroxy-6-methoxy-2H-chromen-2-one                                                                     | C <sub>10</sub> H <sub>8</sub> O <sub>4</sub>                   | 193.0495<br>[M+H] <sup>+</sup> | 193.0493<br>[M+H] <sup>+</sup> | -1.22 | coumarins                     | -    | ↑*** |
| 57 | 3.617 | isofraxidin                                                                                              | C <sub>11</sub> H <sub>10</sub> O <sub>5</sub>                  | 223.0601<br>[M+H] <sup>+</sup> | 223.0598<br>[M+H] <sup>+</sup> | -1.34 | coumarins                     | ↑*** | ↓*** |

|    |       |                                                           |                                                               |                                |                                |       |                               |      |      |
|----|-------|-----------------------------------------------------------|---------------------------------------------------------------|--------------------------------|--------------------------------|-------|-------------------------------|------|------|
| 58 | 3.64  | cryptochlorogenic acid                                    | C <sub>16</sub> H <sub>18</sub> O <sub>9</sub>                | 355.1024<br>[M+H] <sup>+</sup> | 355.1017<br>[M+H] <sup>+</sup> | -1.85 | phenylethanoid glycosides     | ↑*** | ↑*** |
| 59 | 3.765 | gentisic acid                                             | C <sub>7</sub> H <sub>6</sub> O <sub>4</sub>                  | 153.0182<br>[M-H] <sup>-</sup> | 153.0185<br>[M-H] <sup>-</sup> | 1.731 | aromatic acids and its esters | -    | -    |
| 60 | 3.782 | fraxetin                                                  | C <sub>10</sub> H <sub>8</sub> O <sub>5</sub>                 | 209.0444<br>[M+H] <sup>+</sup> | 209.0443<br>[M+H] <sup>+</sup> | -0.72 | coumarins                     | ↑*** | -    |
| 61 | 4.028 | 2,4-dihydroxycinnamic Acid                                | C <sub>9</sub> H <sub>8</sub> O <sub>4</sub>                  | 181.0495<br>[M+H] <sup>+</sup> | 181.0495<br>[M+H] <sup>+</sup> | -0.19 | phenolic acids                | -    | ↑**  |
| 62 | 4.049 | 2-(2-amino-3-methylbutanamido)-3-phenylpropanoic acid     | C <sub>14</sub> H <sub>20</sub> N <sub>2</sub> O <sub>3</sub> | 265.1547<br>[M+H] <sup>+</sup> | 265.1546<br>[M+H] <sup>+</sup> | -0.26 | alkaloids                     | ↓**  | ↓*** |
| 63 | 4.056 | isophthalic acid                                          | C <sub>8</sub> H <sub>6</sub> O <sub>4</sub>                  | 167.0339<br>[M+H] <sup>+</sup> | 167.0342<br>[M+H] <sup>+</sup> | 1.885 | aromatic acids and its esters | -    | ↓*** |
| 64 | 4.087 | 4-caffeoylquinic acid                                     | C <sub>16</sub> H <sub>18</sub> O <sub>9</sub>                | 355.1024<br>[M+H] <sup>+</sup> | 355.1019<br>[M+H] <sup>+</sup> | -1.29 | phenylethanoid glycosides     | ↑*** | ↑*** |
| 65 | 4.108 | 2,3,4,9-tetrahydro-1H-β-carboline-3-carboxylic acid       | C <sub>12</sub> H <sub>12</sub> N <sub>2</sub> O <sub>2</sub> | 217.0972<br>[M+H] <sup>+</sup> | 217.0971<br>[M+H] <sup>+</sup> | -0.25 | alkaloids                     | ↓**  | ↓*** |
| 66 | 4.134 | vallinic acid                                             | C <sub>8</sub> H <sub>8</sub> O <sub>4</sub>                  | 169.0495<br>[M+H] <sup>+</sup> | 169.0493<br>[M+H] <sup>+</sup> | -1.39 | phenolic acids                | -    | ↓*** |
| 67 | 4.174 | 3-O-p-coumaroylquinic acid                                | C <sub>16</sub> H <sub>18</sub> O <sub>8</sub>                | 339.1074<br>[M+H] <sup>+</sup> | 339.1071<br>[M+H] <sup>+</sup> | -1.01 | phenylethanoid glycosides     | -    | ↑*** |
| 68 | 4.258 | 4,5-dicaffeoylquinic acid                                 | C <sub>25</sub> H <sub>24</sub> O <sub>12</sub>               | 517.1341<br>[M+H] <sup>+</sup> | 517.1339<br>[M+H] <sup>+</sup> | -0.3  | phenylethanoid glycosides     | -    | ↑*** |
| 69 | 4.44  | 3-hydroxyscopoletin                                       | C <sub>10</sub> H <sub>8</sub> O <sub>5</sub>                 | 209.0444<br>[M+H] <sup>+</sup> | 209.0441<br>[M+H] <sup>+</sup> | -1.67 | coumarins                     | ↑*** | -    |
| 70 | 4.464 | 3-feruloylquinic acid                                     | C <sub>17</sub> H <sub>20</sub> O <sub>9</sub>                | 369.1180<br>[M+H] <sup>+</sup> | 369.1178<br>[M+H] <sup>+</sup> | -0.57 | phenylethanoid glycosides     | -    | -    |
| 71 | 4.467 | (Z)-ferulic acid                                          | C <sub>10</sub> H <sub>10</sub> O <sub>4</sub>                | 195.0652<br>[M+H] <sup>+</sup> | 195.0651<br>[M+H] <sup>+</sup> | -0.44 | phenolic acids                | -    | -    |
| 72 | 4.482 | N-acetyl-D-alloisoleucine                                 | C <sub>8</sub> H <sub>15</sub> NO <sub>3</sub>                | 174.1125<br>[M+H] <sup>+</sup> | 174.1125<br>[M+H] <sup>+</sup> | 0.173 | amino acids                   | -    | -    |
| 73 | 4.77  | cyclo(leucylprolyl)                                       | C <sub>11</sub> H <sub>18</sub> N <sub>2</sub> O <sub>2</sub> | 211.1441<br>[M+H] <sup>+</sup> | 211.1441<br>[M+H] <sup>+</sup> | -0.02 | alkaloids                     | ↓*** | ↓*** |
| 74 | 4.881 | rutin                                                     | C <sub>27</sub> H <sub>30</sub> O <sub>16</sub>               | 611.1607<br>[M+H] <sup>+</sup> | 611.1599<br>[M+H] <sup>+</sup> | -1.25 | flavonoids                    | -    | ↑*** |
| 75 | 4.883 | phenylalanine                                             | C <sub>10</sub> H <sub>13</sub> NO <sub>2</sub>               | 180.1019<br>[M+H] <sup>+</sup> | 180.1017<br>[M+H] <sup>+</sup> | -1.14 | alkaloids                     | ↑    | ↑*** |
| 76 | 4.923 | vanillin                                                  | C <sub>8</sub> H <sub>8</sub> O <sub>3</sub>                  | 153.0546<br>[M+H] <sup>+</sup> | 153.0546<br>[M+H] <sup>+</sup> | -0.14 | phenolic acids                | -    | ↓*** |
| 77 | 4.933 | 2,4-dihydroxybenzoic acid                                 | C <sub>7</sub> H <sub>6</sub> O <sub>4</sub>                  | 153.0182<br>[M-H] <sup>-</sup> | 153.0185<br>[M-H] <sup>-</sup> | 1.731 | aromatic acids and its esters | -    | ↑*** |
| 78 | 5.104 | quercetin-3β-D-glucoside                                  | C <sub>21</sub> H <sub>20</sub> O <sub>12</sub>               | 465.1028<br>[M+H] <sup>+</sup> | 465.1025<br>[M+H] <sup>+</sup> | -0.54 | flavonoids                    | -    | ↑*** |
| 79 | 5.2   | neohesperidoside kaempferol                               | C <sub>27</sub> H <sub>30</sub> O <sub>15</sub>               | 595.1657<br>[M+H] <sup>+</sup> | 595.1655<br>[M+H] <sup>+</sup> | -0.41 | flavonoids                    | -    | ↑*** |
| 80 | 5.227 | scopoletin                                                | C <sub>10</sub> H <sub>8</sub> O <sub>4</sub>                 | 193.0495<br>[M+H] <sup>+</sup> | 193.0493<br>[M+H] <sup>+</sup> | -1.22 | coumarins                     | -    | ↑*** |
| 81 | 5.307 | (E)-ferulic acid                                          | C <sub>10</sub> H <sub>10</sub> O <sub>4</sub>                | 195.0652<br>[M+H] <sup>+</sup> | 195.0652<br>[M+H] <sup>+</sup> | 0.075 | phenolic acids                | -    | ↓*** |
| 82 | 5.379 | fraxinol                                                  | C <sub>11</sub> H <sub>10</sub> O <sub>5</sub>                | 223.0601<br>[M+H] <sup>+</sup> | 223.06<br>[M+H] <sup>+</sup>   | -0.45 | coumarins                     | ↑*** | ↓*** |
| 83 | 5.478 | 2-(2,6-dihydroxyphenyl)-3,5,7-trihydroxy-4H-chromen-4-one | C <sub>15</sub> H <sub>10</sub> O <sub>7</sub>                | 303.0499<br>[M+H] <sup>+</sup> | 303.0497<br>[M+H] <sup>+</sup> | -0.76 | flavonoids                    | -    | ↑*** |
| 84 | 5.482 | trifolin                                                  | C <sub>21</sub> H <sub>20</sub> O <sub>11</sub>               | 449.1078<br>[M+H] <sup>+</sup> | 449.1078<br>[M+H] <sup>+</sup> | -0.08 | flavonoids                    | -    | ↑*** |
| 85 | 5.483 | kaempferol                                                | C <sub>15</sub> H <sub>10</sub> O <sub>6</sub>                | 287.0550<br>[M+H] <sup>+</sup> | 287.0546<br>[M+H] <sup>+</sup> | -1.44 | flavonoids                    | -    | ↑*** |

|     |       |                                                                                                                                                                                  |                                                 |                                 |                                 |       |                               |      |      |
|-----|-------|----------------------------------------------------------------------------------------------------------------------------------------------------------------------------------|-------------------------------------------------|---------------------------------|---------------------------------|-------|-------------------------------|------|------|
| 86  | 5.516 | 1,3-dicaffeoyl quinic acid                                                                                                                                                       | C <sub>25</sub> H <sub>24</sub> O <sub>12</sub> | [M+H] <sup>+</sup><br>517.1341  | [M+H] <sup>+</sup><br>517.1337  | -0.68 | phenylethanoid glycosides     | -    | ↑*** |
| 87  | 5.666 | 1-caffeoylquinic acid                                                                                                                                                            | C <sub>16</sub> H <sub>18</sub> O <sub>9</sub>  | [M+H] <sup>+</sup><br>355.1024  | [M+H] <sup>+</sup><br>355.1017  | -1.85 | phenylethanoid glycosides     | -    | ↑*** |
| 88  | 5.67  | cis-caffeic acid                                                                                                                                                                 | C <sub>9</sub> H <sub>8</sub> O <sub>4</sub>    | [M+H] <sup>+</sup><br>181.0495  | [M+H] <sup>+</sup><br>181.0493  | -1.3  | phenolic acids                | -    | ↑*** |
| 89  | 5.829 | quercetin                                                                                                                                                                        | C <sub>15</sub> H <sub>10</sub> O <sub>7</sub>  | [M+H] <sup>+</sup><br>303.0499  | [M+H] <sup>+</sup><br>303.0497  | -0.76 | flavonoids                    | -    | ↑*** |
| 90  | 5.83  | 6"-O-acetylisoquercitrin<br>3-<br>{[(2R,3S,4S,5R,6S)-6-{[2-(3,4-dihydroxyphenyl)-5,7-dihydroxy-4-oxo-4H-chromen-3-yl]oxy}-3,4,5-trihydroxyoxan-2-yl]methoxy}-3-oxopropanoic acid | C <sub>23</sub> H <sub>22</sub> O <sub>13</sub> | [M+H] <sup>+</sup><br>507.1133  | [M+H] <sup>+</sup><br>507.1133  | -0.03 | flavonoids                    | -    | ↑*** |
| 91  | 5.831 | 6,8-dihydroxy-7-methoxy-3-methylisocoumarin                                                                                                                                      | C <sub>24</sub> H <sub>22</sub> O <sub>15</sub> | [M+H] <sup>+</sup><br>551.1031  | [M+H] <sup>+</sup><br>551.1029  | -0.45 | others                        | -    | ↑*** |
| 92  | 5.832 | senkyunolide J/N 1                                                                                                                                                               | C <sub>11</sub> H <sub>10</sub> O <sub>5</sub>  | [M+H] <sup>+</sup><br>223.0601  | [M+H] <sup>+</sup><br>223.0599  | -0.9  | others                        | ↑**  | -    |
| 93  | 5.91  | 3-methylsalicylic acid                                                                                                                                                           | C <sub>12</sub> H <sub>18</sub> O <sub>4</sub>  | [M+H] <sup>+</sup><br>227.1278  | [M+H] <sup>+</sup><br>227.1274  | -1.7  | phthalide monomers            | -    | ↓*** |
| 94  | 5.91  | 1,3-dicaffeoylquinic acid                                                                                                                                                        | C <sub>8</sub> H <sub>8</sub> O <sub>3</sub>    | [M+H] <sup>+</sup><br>153.0546  | [M+H] <sup>+</sup><br>153.0545  | -0.79 | aromatic acids and its esters | -    | ↓*** |
| 95  | 5.98  | 2-indolecarbaldehyde                                                                                                                                                             | C <sub>25</sub> H <sub>24</sub> O <sub>12</sub> | [M+H] <sup>+</sup><br>517.1341  | [M+H] <sup>+</sup><br>517.1332  | -1.65 | phenylethanoid glycosides     | -    | ↑*** |
| 96  | 6.054 | 2-(2,4-dihydroxyphenyl)-3,5,7-trihydroxy-4H-chromen-4-one                                                                                                                        | C <sub>9</sub> H <sub>7</sub> NO                | [M+H] <sup>+</sup><br>146.0600  | [M+H] <sup>+</sup><br>146.0599  | -0.96 | alkaloids                     | ↓*** | -    |
| 97  | 6.066 | azelaic acid                                                                                                                                                                     | C <sub>15</sub> H <sub>10</sub> O <sub>7</sub>  | [M+H] <sup>+</sup><br>303.0499  | [M+H] <sup>+</sup><br>303.0496  | -1.09 | flavonoids                    | -    | ↑*** |
| 98  | 6.21  | senkyunolide J/N 2                                                                                                                                                               | C <sub>9</sub> H <sub>16</sub> O <sub>4</sub>   | [M-H] <sup>-</sup><br>187.0965  | [M-H] <sup>-</sup><br>187.0969  | 2.216 | short-chain fatty acids       | -    | ↑*** |
| 99  | 6.312 | (3Z)-3-butylidene-4,5-dihydro-4,5-dihydroxy-1(3H)-isobenzofuranone                                                                                                               | C <sub>12</sub> H <sub>18</sub> O <sub>4</sub>  | [M+H] <sup>+</sup><br>227.1278  | [M+H] <sup>+</sup><br>227.1274  | -1.7  | phthalide monomers            | ↓*** | ↓*** |
| 100 | 6.346 | 3,4,5-tricaffeoylquinic acid                                                                                                                                                     | C <sub>12</sub> H <sub>14</sub> O <sub>4</sub>  | [M+H] <sup>+</sup><br>223.0965  | [M+H] <sup>+</sup><br>223.0964  | -0.38 | phthalide monomers            | -    | ↓*** |
| 101 | 6.486 | fisetin                                                                                                                                                                          | C <sub>34</sub> H <sub>30</sub> O <sub>15</sub> | [M+H] <sup>+</sup><br>679.1657  | [M+H] <sup>+</sup><br>679.1647  | -1.54 | phenylethanoid glycosides     | -    | ↑*** |
| 102 | 6.492 | scoparone                                                                                                                                                                        | C <sub>15</sub> H <sub>10</sub> O <sub>6</sub>  | [M+H] <sup>+</sup><br>287.0550  | [M+H] <sup>+</sup><br>287.0552  | 0.646 | flavonoids                    | -    | ↑*** |
| 103 | 6.545 | isochlorogenic acid B                                                                                                                                                            | C <sub>11</sub> H <sub>10</sub> O <sub>4</sub>  | [M+H] <sup>+</sup><br>207.0652  | [M+H] <sup>+</sup><br>207.0651  | -0.41 | coumarins                     | -    | -    |
| 104 | 6.629 | senkyunolide I/H 1                                                                                                                                                               | C <sub>25</sub> H <sub>24</sub> O <sub>12</sub> | [M+H] <sup>+</sup><br>517.1341  | [M+H] <sup>+</sup><br>517.1337  | -0.68 | phenylethanoid glycosides     | -    | ↑*** |
| 105 | 6.669 | (3S,3aR,10R)-(-)-10-hydroxysedanolid                                                                                                                                             | C <sub>12</sub> H <sub>16</sub> O <sub>4</sub>  | [M+Na] <sup>+</sup><br>247.0941 | [M+Na] <sup>+</sup><br>247.0939 | -0.73 | phthalide monomers            | -    | ↓*** |
| 106 | 6.823 |                                                                                                                                                                                  | C <sub>12</sub> H <sub>18</sub> O <sub>3</sub>  | [M+H] <sup>+</sup><br>211.1329  | [M+H] <sup>+</sup><br>211.1332  | 1.558 | phthalide monomers            | -    | ↑*** |

|     |       |                                                                                                       |                                                |                                 |                                |       |                                       |      |      |
|-----|-------|-------------------------------------------------------------------------------------------------------|------------------------------------------------|---------------------------------|--------------------------------|-------|---------------------------------------|------|------|
| 107 | 6.912 | (3Z)-3-butylidene-4,5-dihydro-6,7-dihydroxy-1(3H)-isobenzofuranone                                    | C <sub>12</sub> H <sub>14</sub> O <sub>4</sub> | 223.0965<br>[M+H] <sup>+</sup>  | 223.0962<br>[M+H] <sup>+</sup> | -1.28 | phthalide monomers                    | -    | ↓*** |
| 108 | 6.930 | (3R)-3-butyl-3,6,7-trihydroxy-1(3H)-isobenzofuranone                                                  | C <sub>12</sub> H <sub>14</sub> O <sub>5</sub> | 239.0914<br>[M+H] <sup>+</sup>  | 239.0914<br>[M+H] <sup>+</sup> | 0     | phthalide monomers                    | -    | ↓*** |
| 109 | 6.96  | chuanxiongnode R2                                                                                     | C <sub>12</sub> H <sub>18</sub> O <sub>4</sub> | 227.1278<br>[M+H] <sup>+</sup>  | 227.1275<br>[M+H] <sup>+</sup> | -1.26 | phthalide monomers                    | ↓*** | ↓*** |
| 110 | 6.963 | senkyunolide I/H 2                                                                                    | C <sub>12</sub> H <sub>16</sub> O <sub>4</sub> | 247.0941<br>[M+Na] <sup>+</sup> | 247.094<br>[M+Na] <sup>+</sup> | -0.32 | phthalide monomers                    | -    | ↓*** |
| 111 | 6.968 | 3,4,5-trihydroxy-6-(hydroxymethyl)oxan-2-yl 2-(prop-1-en-2-yl)-2,3-dihydro-1-benzofuran-5-carboxylate | C <sub>18</sub> H <sub>22</sub> O <sub>8</sub> | 367.1387<br>[M+H] <sup>+</sup>  | 367.1387<br>[M+H] <sup>+</sup> | -0.12 | others                                | ↑*** | ↓*** |
| 112 | 7.291 | 3-carboxyethyl-phthalide                                                                              | C <sub>12</sub> H <sub>18</sub> O <sub>2</sub> | 195.1380<br>[M+H] <sup>+</sup>  | 195.138<br>[M+H] <sup>+</sup>  | 0.223 | phthalide monomers                    | -    | ↑*** |
| 113 | 7.441 | robinetin                                                                                             | C <sub>15</sub> H <sub>10</sub> O <sub>7</sub> | 303.0499<br>[M+H] <sup>+</sup>  | 303.0498<br>[M+H] <sup>+</sup> | -0.43 | flavonoids                            | -    | ↑*** |
| 114 | 7.529 | (Z)-3-butylidene-4,5,6-trihydroxy-1(3H)-isobenzofuranone                                              | C <sub>12</sub> H <sub>12</sub> O <sub>5</sub> | 237.0758<br>[M+H] <sup>+</sup>  | 237.0755<br>[M+H] <sup>+</sup> | -1.05 | phthalide monomers                    | -    | ↓*** |
| 115 | 8.029 | 3-butyl-4,7-dihydroxyphthalide                                                                        | C <sub>12</sub> H <sub>14</sub> O <sub>4</sub> | 223.0965<br>[M+H] <sup>+</sup>  | 223.0964<br>[M+H] <sup>+</sup> | -0.38 | phthalide monomers                    | -    | ↓*** |
| 116 | 8.284 | (3S,3aR,4R)-4-hydroxy-sedanolid                                                                       | C <sub>12</sub> H <sub>18</sub> O <sub>3</sub> | 211.1329<br>[M+H] <sup>+</sup>  | 211.1327<br>[M+H] <sup>+</sup> | -0.81 | phthalide monomers                    | -    | ↓*** |
| 117 | 8.305 | (R)-3-butyl-7-hydroxy-3-methoxyphthalide                                                              | C <sub>13</sub> H <sub>16</sub> O <sub>4</sub> | 237.1121<br>[M+H] <sup>+</sup>  | 237.1119<br>[M+H] <sup>+</sup> | -0.99 | phthalide monomers                    | ↑*** | -    |
| 118 | 8.427 | 8-{3-oxo-2-[(2E)-2-penten-1-yl]-1-cyclopenten-1-yl}octanoic acid                                      | C <sub>18</sub> H <sub>28</sub> O <sub>3</sub> | 293.2111<br>[M+H] <sup>+</sup>  | 293.2105<br>[M+H] <sup>+</sup> | -2.12 | long-chain fatty acids and its eaters | ↑*   | ↑*** |
| 119 | 8.471 | psoralen                                                                                              | C <sub>11</sub> H <sub>6</sub> O <sub>3</sub>  | 187.0390<br>[M+H] <sup>+</sup>  | 187.0388<br>[M+H] <sup>+</sup> | -0.91 | coumarins                             | -    | ↓*** |
| 120 | 8.571 | cyanidin                                                                                              | C <sub>15</sub> H <sub>10</sub> O <sub>6</sub> | 287.0550<br>[M+H] <sup>+</sup>  | 287.0549<br>[M+H] <sup>+</sup> | -0.4  | flavonoids                            | -    | ↑*** |
| 121 | 8.579 | 2-hydroxyphenyl valerate                                                                              | C <sub>11</sub> H <sub>14</sub> O <sub>3</sub> | 195.1016<br>[M+H] <sup>+</sup>  | 195.1016<br>[M+H] <sup>+</sup> | 0.15  | aromatic acids and its esters         | -    | ↓*** |
| 122 | 8.743 | (3S,3aR,6S)-6-hydroxy-sedanolid                                                                       | C <sub>12</sub> H <sub>18</sub> O <sub>3</sub> | 211.1329<br>[M+H] <sup>+</sup>  | 211.1332<br>[M+H] <sup>+</sup> | 1.558 | phthalide monomers                    | -    | ↓*** |
| 123 | 8.803 | bergapten                                                                                             | C <sub>12</sub> H <sub>8</sub> O <sub>4</sub>  | 217.0495<br>[M+H] <sup>+</sup>  | 217.0492<br>[M+H] <sup>+</sup> | -1.54 | coumarins                             | -    | ↑*** |
| 124 | 8.852 | 3-(3-hydroxybutyl)-1(3H)-isobenzofuranone                                                             | C <sub>12</sub> H <sub>14</sub> O <sub>3</sub> | 207.1016<br>[M+H] <sup>+</sup>  | 207.1015<br>[M+H] <sup>+</sup> | -0.34 | phthalide monomers                    | -    | ↓*** |
| 125 | 8.94  | (3Z)-4,5,6,7-                                                                                         | C <sub>11</sub> H <sub>14</sub> O <sub>2</sub> | 179.1067                        | 179.1065                       | -0.87 | phthalide                             | -    | ↓*** |

|     |        |                                                              |                                                   |                                |                                |       |                               |   |      |
|-----|--------|--------------------------------------------------------------|---------------------------------------------------|--------------------------------|--------------------------------|-------|-------------------------------|---|------|
|     |        | tetrahydro-3-propylidene-1(3H)-isobenzofuranone              |                                                   | [M+H] <sup>+</sup>             | [M+H] <sup>+</sup>             |       | monomers                      |   |      |
| 126 | 8.948  | 3-butyl-6,7-dihydroxyphthalide                               | C <sub>12</sub> H <sub>14</sub> O <sub>4</sub>    | 223.0965<br>[M+H] <sup>+</sup> | 223.0964<br>[M+H] <sup>+</sup> | -0.38 | phthalide monomers            | - | ↓*** |
| 127 | 9.122  | senkyunolide D                                               | C <sub>12</sub> H <sub>14</sub> O <sub>4</sub>    | 223.0965<br>[M+H] <sup>+</sup> | 223.0963<br>[M+H] <sup>+</sup> | -0.83 | phthalide monomers            | ↓ | ↓*** |
| 128 | 9.127  | senkyunolide K                                               | C <sub>12</sub> H <sub>16</sub> O <sub>3</sub>    | 209.1172<br>[M+H] <sup>+</sup> | 209.117<br>[M+H] <sup>+</sup>  | -1.06 | phthalide monomers            | - | -    |
| 129 | 9.327  | 5-hydroxyphthalide                                           | C <sub>12</sub> H <sub>14</sub> O <sub>3</sub>    | 207.1016<br>[M+H] <sup>+</sup> | 207.1013<br>[M+H] <sup>+</sup> | -1.31 | phthalide monomers            | - | ↓*** |
| 130 | 9.337  | senkyunolide G                                               | C <sub>12</sub> H <sub>16</sub> O <sub>3</sub>    | 209.1172<br>[M+H] <sup>+</sup> | 209.1172<br>[M+H] <sup>+</sup> | -0.1  | phthalide monomers            | - | ↓*** |
| 131 | 9.542  | senkyunolide F                                               | C <sub>12</sub> H <sub>14</sub> O <sub>3</sub>    | 207.1016<br>[M+H] <sup>+</sup> | 207.1013<br>[M+H] <sup>+</sup> | -1.31 | phthalide monomers            | - | ↓*** |
| 132 | 9.552  | ethyl ferulate                                               | C <sub>12</sub> H <sub>14</sub> O <sub>4</sub>    | 223.0965<br>[M+H] <sup>+</sup> | 223.0962<br>[M+H] <sup>+</sup> | -1.28 | coumarins                     | ↓ | ↓*** |
| 133 | 9.669  | (3R,3aR)-3a,4,5,6-tetrahydro-3-propyl-1(3H)-isobenzofuranone | C <sub>11</sub> H <sub>16</sub> O <sub>2</sub>    | 181.1223<br>[M+H] <sup>+</sup> | 181.1221<br>[M+H] <sup>+</sup> | -1.14 | phthalide monomers            | - | ↑*** |
| 134 | 9.777  | (4Z)-4-butylidenehexahydrooxireno[e]isobenzofuran-6(1aH)-one | C <sub>12</sub> H <sub>16</sub> O <sub>3</sub>    | 209.1172<br>[M+H] <sup>+</sup> | 209.1172<br>[M+H] <sup>+</sup> | -0.1  | phthalide monomers            | ↓ | ↓*** |
| 135 | 9.78   | senkyunolide E                                               | C <sub>12</sub> H <sub>12</sub> O <sub>3</sub>    | 205.0859<br>[M+H] <sup>+</sup> | 205.0856<br>[M+H] <sup>+</sup> | -1.56 | phthalide monomers            | - | -    |
| 136 | 9.853  | (E)-3-butylidene-4,5,6-trihydroxy-1(3H)-Isobenzofuranone     | C <sub>12</sub> H <sub>12</sub> O <sub>5</sub>    | 237.0758<br>[M+H] <sup>+</sup> | 237.0756<br>[M+H] <sup>+</sup> | -0.63 | phthalide monomers            | - | ↓*   |
| 137 | 9.88   | 4-hydroxy-3-butylphthalide                                   | C <sub>12</sub> H <sub>14</sub> O <sub>3</sub>    | 207.1016<br>[M+H] <sup>+</sup> | 207.1015<br>[M+H] <sup>+</sup> | -0.34 | phthalide monomers            | - | ↓*** |
| 138 | 9.988  | acetophenone                                                 | C <sub>8</sub> H <sub>8</sub> O                   | 121.0648<br>[M+H] <sup>+</sup> | 121.0649<br>[M+H] <sup>+</sup> | 0.896 | others                        | - | -    |
| 139 | 10.176 | butyl benzoate                                               | C <sub>11</sub> H <sub>14</sub> O <sub>2</sub>    | 179.1067<br>[M+H] <sup>+</sup> | 179.1064<br>[M+H] <sup>+</sup> | -1.43 | aromatic acids and its esters | - | ↓*** |
| 140 | 10.263 | 6,7-exoxyligustilide                                         | C <sub>12</sub> H <sub>14</sub> O <sub>3</sub>    | 207.1016<br>[M+H] <sup>+</sup> | 207.1013<br>[M+H] <sup>+</sup> | -1.31 | phthalide monomers            | - | ↓*** |
| 141 | 10.344 | senkyunolide C                                               | C <sub>12</sub> H <sub>12</sub> O <sub>3</sub>    | 205.0859<br>[M+H] <sup>+</sup> | 205.0857<br>[M+H] <sup>+</sup> | -1.08 | phthalide monomers            | - | -    |
| 142 | 10.595 | senkyunolide M/Q 1                                           | C <sub>16</sub> H <sub>22</sub> O <sub>4</sub>    | 279.1591<br>[M+H] <sup>+</sup> | 279.1586<br>[M+H] <sup>+</sup> | -1.74 | phthalide monomers            | - | -    |
| 143 | 10.602 | senkyunolide L                                               | C <sub>12</sub> H <sub>15</sub> O <sub>3</sub> Cl | 243.0782<br>[M+H] <sup>+</sup> | 243.0781<br>[M+H] <sup>+</sup> | -0.61 | phthalide monomers            | - | -    |
| 144 | 10.717 | 3-coumaric acid                                              | C <sub>9</sub> H <sub>8</sub> O <sub>3</sub>      | 163.0390<br>[M-H] <sup>-</sup> | 163.0394<br>[M-H] <sup>-</sup> | 2.634 | coumarins                     | - | ↓*** |
| 145 | 10.784 | 4-hydroxy-butylidenephthalide                                | C <sub>12</sub> H <sub>12</sub> O <sub>3</sub>    | 205.0859<br>[M+H] <sup>+</sup> | 205.0858<br>[M+H] <sup>+</sup> | -0.59 | phthalide monomers            | - | ↓*** |
| 146 | 10.902 | dimethyl Phthalate                                           | C <sub>10</sub> H <sub>10</sub> O <sub>4</sub>    | 195.0652<br>[M+H] <sup>+</sup> | 195.0649<br>[M+H] <sup>+</sup> | -1.46 | aromatic acids and its esters | - | ↓*** |
| 147 | 11.254 | senkyunolide M/Q 2                                           | C <sub>16</sub> H <sub>22</sub> O <sub>4</sub>    | 279.1591<br>[M+H] <sup>+</sup> | 279.1589<br>[M+H] <sup>+</sup> | -0.67 | phthalide monomers            | ↓ | ↓*** |
| 148 | 11.297 | senkyunolide B                                               | C <sub>12</sub> H <sub>12</sub> O <sub>3</sub>    | 205.0859<br>[M+H] <sup>+</sup> | 205.0859<br>[M+H] <sup>+</sup> | -0.1  | phthalide monomers            | - | ↓*** |
| 149 | 11.576 | 3-butyl-4,5-dihydro-7-hydroxy-6-(1-                          | C <sub>16</sub> H <sub>22</sub> O <sub>4</sub>    | 279.1591<br>[M+H] <sup>+</sup> | 279.1586<br>[M+H] <sup>+</sup> | -1.74 | phthalide monomers            | - | ↓*** |

|     |        |                                                  |                                                 |                                |                                |       |                                       |     |      |
|-----|--------|--------------------------------------------------|-------------------------------------------------|--------------------------------|--------------------------------|-------|---------------------------------------|-----|------|
|     |        | oxobutyl)-1(3H)-isobenzofurane                   |                                                 |                                |                                |       |                                       |     |      |
| 150 | 11.676 | (Z)-propylidene phthalide                        | C <sub>11</sub> H <sub>12</sub> O <sub>2</sub>  | 177.0910<br>[M+H] <sup>+</sup> | 177.0909<br>[M+H] <sup>+</sup> | -0.6  | phthalide monomers                    | -   | ↓*** |
| 151 | 11.746 | senkyunolide A                                   | C <sub>12</sub> H <sub>16</sub> O <sub>2</sub>  | 193.1223<br>[M+H] <sup>+</sup> | 193.1221<br>[M+H] <sup>+</sup> | -1.07 | phthalide monomers                    | -   | ↓*** |
| 152 | 11.915 | chuanxiongnode L5 or its isomer 1                | C <sub>24</sub> H <sub>30</sub> O <sub>6</sub>  | 415.2115<br>[M+H] <sup>+</sup> | 415.2109<br>[M+H] <sup>+</sup> | -1.48 | phthalide dimers                      | -   | ↑*** |
| 153 | 11.958 | 3-butyl-5,6-dihydro-4H-isobenzofuran-1-one       | C <sub>12</sub> H <sub>16</sub> O <sub>2</sub>  | 193.1223<br>[M+H] <sup>+</sup> | 193.1222<br>[M+H] <sup>+</sup> | -0.55 | phthalide monomers                    | -   | ↓*** |
| 154 | 12.072 | phthaldialdehyde                                 | C <sub>8</sub> H <sub>6</sub> O <sub>2</sub>    | 135.0441<br>[M+H] <sup>+</sup> | 135.0440<br>[M+H] <sup>+</sup> | -0.41 | others                                | -   | ↓*** |
| 155 | 12.073 | butylphthalide                                   | C <sub>12</sub> H <sub>14</sub> O <sub>2</sub>  | 191.1067<br>[M+H] <sup>+</sup> | 191.1065<br>[M+H] <sup>+</sup> | -0.82 | phthalide monomers                    | -   | ↓*** |
| 156 | 12.278 | neocnidilide                                     | C <sub>12</sub> H <sub>18</sub> O <sub>2</sub>  | 195.1380<br>[M+H] <sup>+</sup> | 195.138<br>[M+H] <sup>+</sup>  | 0.223 | phthalide monomers                    | -   | ↓*** |
| 157 | 12.601 | (3Z)-3-butylidene-4-methoxy-1(3H)-isobenzofurane | C <sub>13</sub> H <sub>14</sub> O <sub>3</sub>  | 219.1016<br>[M+H] <sup>+</sup> | 219.1014<br>[M+H] <sup>+</sup> | -0.78 | phthalide monomers                    | -   | -    |
| 158 | 12.816 | E-ligustilide                                    | C <sub>12</sub> H <sub>14</sub> O <sub>2</sub>  | 191.1067<br>[M+H] <sup>+</sup> | 191.1064<br>[M+H] <sup>+</sup> | -1.34 | phthalide monomers                    | -   | ↓*** |
| 159 | 12.926 | cnidilide                                        | C <sub>12</sub> H <sub>18</sub> O <sub>2</sub>  | 195.1380<br>[M+H] <sup>+</sup> | 195.1377<br>[M+H] <sup>+</sup> | -1.31 | phthalide monomers                    | -   | ↓*** |
| 160 | 12.967 | E-butenylphthalide                               | C <sub>12</sub> H <sub>12</sub> O <sub>2</sub>  | 189.0910<br>[M+H] <sup>+</sup> | 189.0909<br>[M+H] <sup>+</sup> | -0.56 | phthalide monomers                    | -   | ↓*** |
| 161 | 13.105 | 4-methyl-6-phenyl-5,6-dihydro-2H-pyran-2-one     | C <sub>12</sub> H <sub>12</sub> O <sub>2</sub>  | 189.0910<br>[M+H] <sup>+</sup> | 189.0909<br>[M+H] <sup>+</sup> | -0.56 | others                                | -   | ↓*** |
| 162 | 13.11  | α-linolenic acid                                 | C <sub>18</sub> H <sub>30</sub> O <sub>2</sub>  | 279.2319<br>[M+H] <sup>+</sup> | 279.2316<br>[M+H] <sup>+</sup> | -0.92 | long-chain fatty acids and its eaters | ↓** | -    |
| 163 | 13.115 | chuanxiongnode L5 or its isomer 2                | C <sub>24</sub> H <sub>30</sub> O <sub>6</sub>  | 415.2115<br>[M+H] <sup>+</sup> | 415.2111<br>[M+H] <sup>+</sup> | -1    | phthalide dimers                      | -   | -    |
| 165 | 13.304 | Z-ligustilide                                    | C <sub>12</sub> H <sub>14</sub> O <sub>2</sub>  | 191.1067<br>[M+H] <sup>+</sup> | 191.1064<br>[M+H] <sup>+</sup> | -1.34 | phthalide monomers                    | -   | ↓*** |
| 164 | 13.332 | isocnidilide                                     | C <sub>12</sub> H <sub>18</sub> O <sub>2</sub>  | 195.1380<br>[M+H] <sup>+</sup> | 195.1376<br>[M+H] <sup>+</sup> | -1.83 | phthalide monomers                    | -   | -    |
| 166 | 13.684 | chuanxiongnode A/B                               | C <sub>24</sub> H <sub>28</sub> O <sub>5</sub>  | 397.2010<br>[M+H] <sup>+</sup> | 397.2004<br>[M+H] <sup>+</sup> | -1.39 | phthalide dimers                      | -   | ↓*** |
| 167 | 13.715 | Z-butenylphthalide                               | C <sub>12</sub> H <sub>12</sub> O <sub>2</sub>  | 189.0910<br>[M+H] <sup>+</sup> | 189.0908<br>[M+H] <sup>+</sup> | -1.09 | phthalide monomers                    | -   | ↓*** |
| 168 | 13.764 | chuanxiongnode L5 or its isomer 3                | C <sub>24</sub> H <sub>30</sub> O <sub>6</sub>  | 415.2115<br>[M+H] <sup>+</sup> | 415.2106<br>[M+H] <sup>+</sup> | -2.2  | phthalide dimers                      | -   | -    |
| 169 | 13.817 | CV-1                                             | C <sub>24</sub> H <sub>30</sub> O <sub>5</sub>  | 399.2166<br>[M+H] <sup>+</sup> | 399.2162<br>[M+H] <sup>+</sup> | -1    | phthalide dimers                      | -   | ↓*** |
| 170 | 13.953 | demethywallichilide                              | C <sub>24</sub> H <sub>30</sub> O <sub>5</sub>  | 399.2166<br>[M+H] <sup>+</sup> | 399.2165<br>[M+H] <sup>+</sup> | -0.25 | phthalide dimers                      | -   | -    |
| 171 | 13.987 | 3-butylhexahydro-1(3H)-isobenzofurane            | C <sub>12</sub> H <sub>20</sub> O <sub>2</sub>  | 197.1536<br>[M+H] <sup>+</sup> | 197.1537<br>[M+H] <sup>+</sup> | 0.475 | phthalide monomers                    | -   | -    |
| 172 | 14.339 | CII-1                                            | C <sub>24</sub> H <sub>28</sub> O <sub>5</sub>  | 397.2010<br>[M+H] <sup>+</sup> | 397.2005<br>[M+H] <sup>+</sup> | -1.13 | phthalide dimers                      | -   | ↓*** |
| 173 | 14.919 | 2-aminooctadec-4-yne-1,3-diol                    | C <sub>18</sub> H <sub>35</sub> NO <sub>2</sub> | 298.2741<br>[M+H] <sup>+</sup> | 298.2738<br>[M+H] <sup>+</sup> | -0.86 | long-chain fatty acids and its eaters | -   | ↓**  |
| 174 | 15.59  | DI-1                                             | C <sub>24</sub> H <sub>30</sub> O <sub>4</sub>  | 383.2217                       | 383.2213                       | -1.01 | phthalide                             | -   | ↓*** |

|     |            |                                                           |                                                      |                                |                                |                    |                                             |      |      |
|-----|------------|-----------------------------------------------------------|------------------------------------------------------|--------------------------------|--------------------------------|--------------------|---------------------------------------------|------|------|
|     | 3          |                                                           |                                                      |                                | [M+H] <sup>+</sup>             | [M+H] <sup>+</sup> | dimers                                      |      |      |
| 175 | 15.72<br>8 | 12-oxo<br>phytodienoic<br>Acid                            | C <sub>18</sub> H <sub>28</sub> O <sub>3</sub>       | 293.2111<br>[M+H] <sup>+</sup> | 293.2104<br>[M+H] <sup>+</sup> | -2.46              | long-chain fatty<br>acids and its<br>esters | -    | ↑*** |
| 176 | 16.22<br>2 | 9S,13R-12-<br>oxophytodienoic<br>acid                     | C <sub>18</sub> H <sub>28</sub> O <sub>3</sub>       | 293.2111<br>[M+H] <sup>+</sup> | 293.2105<br>[M+H] <sup>+</sup> | -2.12              | long-chain fatty<br>acids and its<br>esters | -    | ↑*** |
| 177 | 16.83<br>9 | 3,8-dihydro-<br>diligustilide                             | C <sub>24</sub> H <sub>32</sub> O <sub>4</sub>       | 385.2373<br>[M+H] <sup>+</sup> | 385.2367<br>[M+H] <sup>+</sup> | -1.65              | phthalide<br>dimers                         | -    | -    |
| 178 | 16.84      | riligustilide                                             | C <sub>24</sub> H <sub>28</sub> O <sub>4</sub>       | 381.2060<br>[M+H] <sup>+</sup> | 381.2054<br>[M+H] <sup>+</sup> | -1.67              | phthalide<br>dimers                         | -    | -    |
| 179 | 17.00<br>5 | Z,Z'-3,3',8,8'-<br>diligustilide                          | C <sub>24</sub> H <sub>28</sub> O <sub>4</sub>       | 381.2060<br>[M+H] <sup>+</sup> | 381.2056<br>[M+H] <sup>+</sup> | -1.14              | phthalide<br>dimers                         | -    | ↓*** |
| 180 | 17.30<br>9 | (Z)-3,8-dihydro-<br>6,6',7,3'a-<br>diligustilide          | C <sub>24</sub> H <sub>30</sub> O <sub>4</sub>       | 383.2217<br>[M+H] <sup>+</sup> | 383.2211<br>[M+H] <sup>+</sup> | -1.53              | phthalide<br>dimers                         | -    | ↓*** |
| 181 | 17.66<br>2 | 3,8-dihydro-<br>levistilide A                             | C <sub>24</sub> H <sub>30</sub> O <sub>4</sub>       | 383.2217<br>[M+H] <sup>+</sup> | 383.2213<br>[M+H] <sup>+</sup> | -1.01              | phthalide<br>dimers                         | -    | -    |
| 182 | 17.83<br>4 | 9-oxo-ODE<br>isomer 1                                     | or<br>C <sub>18</sub> H <sub>30</sub> O <sub>3</sub> | 295.2268<br>[M+H] <sup>+</sup> | 295.2264<br>[M+H] <sup>+</sup> | -1.26              | long-chain fatty<br>acids and its<br>esters | -    | -    |
| 183 | 18.16<br>9 | 9-oxo-ODE<br>isomer 2                                     | or<br>C <sub>18</sub> H <sub>30</sub> O <sub>3</sub> | 295.2268<br>[M+H] <sup>+</sup> | 295.2266<br>[M+H] <sup>+</sup> | -0.58              | long-chain fatty<br>acids and its<br>esters | -    | ↑*** |
| 184 | 18.23<br>9 | DI-2                                                      | C <sub>24</sub> H <sub>30</sub> O <sub>4</sub>       | 383.2217<br>[M+H] <sup>+</sup> | 383.2214<br>[M+H] <sup>+</sup> | -0.75              | phthalide<br>dimers                         | -    | ↑*** |
| 185 | 18.47<br>9 | DII-1                                                     | C <sub>24</sub> H <sub>30</sub> O <sub>5</sub>       | 399.2166<br>[M+H] <sup>+</sup> | 399.216<br>[M+H] <sup>+</sup>  | -1.5               | phthalide<br>dimers                         | -    | ↓*** |
| 186 | 18.51<br>1 | 9-oxo-ODE<br>isomer 3                                     | or<br>C <sub>18</sub> H <sub>30</sub> O <sub>3</sub> | 295.2268<br>[M+H] <sup>+</sup> | 295.2265<br>[M+H] <sup>+</sup> | -0.92              | long-chain fatty<br>acids and its<br>esters | -    | ↑*** |
| 187 | 18.63<br>2 | senkyunolide P                                            | C <sub>24</sub> H <sub>30</sub> O <sub>4</sub>       | 383.2217<br>[M+H] <sup>+</sup> | 383.2211<br>[M+H] <sup>+</sup> | -1.53              | phthalide<br>dimers                         | -    | ↓*** |
| 188 | 18.8       | angelicolide                                              | C <sub>24</sub> H <sub>28</sub> O <sub>4</sub>       | 381.2060<br>[M+H] <sup>+</sup> | 381.2058<br>[M+H] <sup>+</sup> | -0.62              | phthalide<br>dimers                         | -    | -    |
| 189 | 18.82<br>7 | chuanxiongdioli<br>de A                                   | C <sub>24</sub> H <sub>32</sub> O <sub>4</sub>       | 385.2373<br>[M+H] <sup>+</sup> | 385.2369<br>[M+H] <sup>+</sup> | -1.13              | phthalide<br>dimers                         | -    | ↓*** |
| 190 | 18.86<br>6 | BII-1                                                     | C <sub>24</sub> H <sub>26</sub> O <sub>5</sub>       | 395.1853<br>[M+H] <sup>+</sup> | 395.1848<br>[M+H] <sup>+</sup> | -1.27              | phthalide<br>dimers                         | -    | ↓*** |
| 191 | 19.03<br>4 | 9-oxo-ODE<br>isomer 4                                     | or<br>C <sub>18</sub> H <sub>30</sub> O <sub>3</sub> | 295.2268<br>[M+H] <sup>+</sup> | 295.2266<br>[M+H] <sup>+</sup> | -0.58              | long-chain fatty<br>acids and its<br>esters | -    | ↑*** |
| 192 | 19.13<br>3 | wallichilide                                              | C <sub>25</sub> H <sub>32</sub> O <sub>5</sub>       | 413.2323<br>[M+H] <sup>+</sup> | 413.2316<br>[M+H] <sup>+</sup> | -1.57              | phthalide<br>dimers                         | ↑**  | ↓*** |
| 193 | 19.13<br>8 | 4,5-dehydro-<br>diligustilide                             | C <sub>24</sub> H <sub>26</sub> O <sub>4</sub>       | 379.1904<br>[M+H] <sup>+</sup> | 379.1899<br>[M+H] <sup>+</sup> | -1.28              | phthalide<br>dimers                         | -    | ↑*** |
| 194 | 19.27      | levistolide B                                             | C <sub>24</sub> H <sub>28</sub> O <sub>4</sub>       | 381.2060<br>[M+H] <sup>+</sup> | 381.2054<br>[M+H] <sup>+</sup> | -1.67              | phthalide<br>dimers                         | -    | -    |
| 195 | 19.33<br>6 | methyl ester<br>derived from<br>angeolide                 | C <sub>25</sub> H <sub>32</sub> O <sub>5</sub>       | 413.2323<br>[M+H] <sup>+</sup> | 413.2316<br>[M+H] <sup>+</sup> | -1.57              | phthalide<br>dimers                         | ↑*   | ↓*** |
| 196 | 19.37<br>4 | senkyunolide O                                            | C <sub>24</sub> H <sub>28</sub> O <sub>4</sub>       | 381.2060<br>[M+H] <sup>+</sup> | 381.2053<br>[M+H] <sup>+</sup> | -1.93              | phthalide<br>dimers                         | -    | ↑*** |
| 197 | 19.39<br>6 | levistolide A                                             | C <sub>24</sub> H <sub>28</sub> O <sub>4</sub>       | 381.2060<br>[M+H] <sup>+</sup> | 381.2056<br>[M+H] <sup>+</sup> | -1.14              | phthalide<br>dimers                         | -    | -    |
| 198 | 19.66<br>7 | DI-3                                                      | C <sub>24</sub> H <sub>30</sub> O <sub>4</sub>       | 383.2217<br>[M+H] <sup>+</sup> | 383.2213<br>[M+H] <sup>+</sup> | -1.01              | phthalide<br>dimers                         | -    | ↑*** |
| 199 | 19.79<br>6 | DII-2                                                     | C <sub>24</sub> H <sub>30</sub> O <sub>5</sub>       | 399.2166<br>[M+H] <sup>+</sup> | 399.2166<br>[M+H] <sup>+</sup> | -0                 | phthalide<br>dimers                         | ↑*** | ↑*** |
| 200 | 19.87<br>9 | DI-4                                                      | C <sub>24</sub> H <sub>30</sub> O <sub>4</sub>       | 383.2217<br>[M+H] <sup>+</sup> | 383.2211<br>[M+H] <sup>+</sup> | -1.53              | phthalide<br>dimers                         | -    | ↑*** |
| 201 | 20.01<br>1 | (3Z)-<br>(3aR,6S,3'R,8S)-<br>3a,8',6,3'-<br>diligustilide | C <sub>24</sub> H <sub>28</sub> O <sub>4</sub>       | 381.2060<br>[M+H] <sup>+</sup> | 381.2061<br>[M+H] <sup>+</sup> | 0.168              | phthalide<br>dimers                         | -    | ↑*** |
| 202 | 20.10<br>6 | FII-1                                                     | C <sub>24</sub> H <sub>32</sub> O <sub>5</sub>       | 401.2323<br>[M+H] <sup>+</sup> | 401.2315<br>[M+H] <sup>+</sup> | -1.87              | phthalide<br>dimers                         | ↓*** | ↑*** |
| 203 | 20.11<br>5 | DI-5                                                      | C <sub>24</sub> H <sub>30</sub> O <sub>4</sub>       | 383.2217<br>[M+H] <sup>+</sup> | 383.2212<br>[M+H] <sup>+</sup> | -1.27              | phthalide<br>dimers                         | -    | ↑*** |

|     |            |                                                        |                                                 |                                               |                                               |       |                                             |      |      |
|-----|------------|--------------------------------------------------------|-------------------------------------------------|-----------------------------------------------|-----------------------------------------------|-------|---------------------------------------------|------|------|
| 204 | 20.38<br>2 | tokinolide A                                           | C <sub>24</sub> H <sub>28</sub> O <sub>4</sub>  | 381.2060<br>[M+H] <sup>+</sup>                | 381.206<br>[M+H] <sup>+</sup>                 | -0.09 | phthalide<br>dimers                         | -    | ↑*** |
| 205 | 20.44<br>9 | chaxiongrolide F                                       | C <sub>24</sub> H <sub>30</sub> O <sub>4</sub>  | 383.2217<br>[M+H] <sup>+</sup>                | 383.2215<br>[M+H] <sup>+</sup>                | -0.49 | phthalide<br>dimers                         | -    | ↑*** |
| 206 | 20.55<br>9 | tokiaerialide                                          | C <sub>24</sub> H <sub>28</sub> O <sub>4</sub>  | 381.2060<br>[M+H] <sup>+</sup>                | 381.2054<br>[M+H] <sup>+</sup>                | -1.67 | phthalide<br>dimers                         | -    | ↑*** |
| 207 | 20.67<br>4 | CI-1                                                   | C <sub>24</sub> H <sub>28</sub> O <sub>4</sub>  | 381.2060<br>[M+H] <sup>+</sup>                | 381.2057<br>[M+H] <sup>+</sup>                | -0.88 | phthalide<br>dimers                         | -    | ↑*** |
| 208 | 20.82<br>6 | all-cis-<br>4,7,10,13,16-<br>docosapentaeno<br>ic acid | C <sub>22</sub> H <sub>34</sub> O <sub>2</sub>  | 331.2632<br>[M+H] <sup>+</sup>                | 331.2629<br>[M+H] <sup>+</sup>                | -0.78 | long-chain fatty<br>acids and its<br>esters | -    | ↓*** |
| 209 | 20.88<br>7 | chaxiongrolide<br>D                                    | C <sub>24</sub> H <sub>32</sub> O <sub>4</sub>  | 385.2373<br>[M+H] <sup>+</sup>                | 385.2375<br>[M+H] <sup>+</sup>                | 0.426 | phthalide<br>dimers                         | ↓**  | ↑*** |
| 210 | 20.92<br>2 | neodiligustilide                                       | C <sub>24</sub> H <sub>28</sub> O <sub>4</sub>  | 381.2060<br>[M+H] <sup>+</sup>                | 381.2058<br>[M+H] <sup>+</sup>                | -0.62 | phthalide<br>dimers                         | -    | ↑*** |
| 211 | 21.06<br>9 | DI-6                                                   | C <sub>24</sub> H <sub>30</sub> O <sub>4</sub>  | 383.2217<br>[M+H] <sup>+</sup>                | 383.2215<br>[M+H] <sup>+</sup>                | -0.49 | phthalide<br>dimers                         | -    | -    |
| 212 | 21.20<br>6 | palmitoyl<br>ethanolamide                              | C <sub>18</sub> H <sub>37</sub> NO <sub>2</sub> | 300.2897<br>[M+H] <sup>+</sup>                | 300.2892<br>[M+H] <sup>+</sup>                | -1.68 | long-chain fatty<br>acids and its<br>esters | -    | -    |
| 213 | 21.23<br>9 | (S)-1-linoleoyl<br>glycerol                            | C <sub>21</sub> H <sub>38</sub> O <sub>4</sub>  | 355.2843<br>[M+H] <sup>+</sup>                | 355.2843<br>[M+H] <sup>+</sup>                | 0.039 | long-chain fatty<br>acids and its<br>esters | ↓*** | -    |
| 214 | 21.24<br>7 | pinolenic acid                                         | C <sub>18</sub> H <sub>30</sub> O <sub>2</sub>  | 279.2319<br>[M+H] <sup>+</sup>                | 279.2317<br>[M+H] <sup>+</sup>                | -0.56 | long-chain fatty<br>acids and its<br>esters | ↓*** | ↓*** |
| 215 | 21.42<br>1 | triligustilides<br>A/B/C or its<br>isomer 1            | C <sub>36</sub> H <sub>42</sub> O <sub>6</sub>  | 588.3320<br>[M+NH <sub>4</sub> ] <sup>+</sup> | 588.3318<br>[M+NH <sub>4</sub> ] <sup>+</sup> | -0.28 | phthalide<br>trimers                        | -    | ↑*** |
| 216 | 21.47<br>3 | chaxiongrolide E                                       | C <sub>24</sub> H <sub>32</sub> O <sub>4</sub>  | 385.2373<br>[M+H] <sup>+</sup>                | 385.2379<br>[M+H] <sup>+</sup>                | 1.464 | phthalide<br>dimers                         | -    | ↑*** |
| 217 | 21.53<br>9 | (R)-1-linoleoyl<br>glycerol                            | C <sub>21</sub> H <sub>38</sub> O <sub>4</sub>  | 355.2843<br>[M+H] <sup>+</sup>                | 355.2838<br>[M+H] <sup>+</sup>                | -1.37 | long-chain fatty<br>acids and its<br>esters | -    | -    |
| 218 | 21.65<br>3 | oleoyl<br>ethanolamide                                 | C <sub>20</sub> H <sub>39</sub> NO <sub>2</sub> | 326.3054<br>[M+H] <sup>+</sup>                | 326.3051<br>[M+H] <sup>+</sup>                | -0.78 | long-chain fatty<br>acids and its<br>esters | -    | ↓*** |
| 219 | 21.76<br>6 | 16-<br>hydroxyhexadec<br>anoic acid                    | C <sub>16</sub> H <sub>32</sub> O <sub>3</sub>  | 271.2268<br>[M+H] <sup>+</sup>                | 271.2279<br>[M+H] <sup>+</sup>                | 4.161 | long-chain fatty<br>acids and its<br>esters | -    | -    |
| 220 | 21.86<br>6 | triligustilides<br>A/B/C or its<br>isomer 2            | C <sub>36</sub> H <sub>42</sub> O <sub>6</sub>  | 588.3320<br>[M+NH <sub>4</sub> ] <sup>+</sup> | 588.3314<br>[M+NH <sub>4</sub> ] <sup>+</sup> | -0.96 | phthalide<br>trimers                        | -    | ↑*** |
| 221 | 21.87<br>2 | Z,Z'-3,3'a,7,7'a-<br>diligustilide                     | C <sub>24</sub> H <sub>28</sub> O <sub>4</sub>  | 381.2060<br>[M+H] <sup>+</sup>                | 381.2058<br>[M+H] <sup>+</sup>                | -0.62 | phthalide<br>dimers                         | -    | ↑*** |
| 222 | 22.07<br>1 | chuanxiongdioli<br>de R5                               | C <sub>24</sub> H <sub>32</sub> O <sub>4</sub>  | 385.2373<br>[M+H] <sup>+</sup>                | 385.2370<br>[M+H] <sup>+</sup>                | -0.87 | phthalide<br>dimers                         | ↓**  | ↑*** |
| 223 | 22.15<br>2 | triligustilides<br>A/B/C or its<br>isomer 3            | C <sub>36</sub> H <sub>42</sub> O <sub>6</sub>  | 588.3320<br>[M+NH <sub>4</sub> ] <sup>+</sup> | 588.3315<br>[M+NH <sub>4</sub> ] <sup>+</sup> | -0.79 | phthalide<br>trimers                        | -    | ↑*** |
| 224 | 22.15<br>6 | hexadecanamid<br>e                                     | C <sub>16</sub> H <sub>33</sub> NO              | 256.2635<br>[M+H] <sup>+</sup>                | 256.2632<br>[M+H] <sup>+</sup>                | -1.14 | long-chain fatty<br>acids and its<br>esters | -    | ↑*** |
| 225 | 22.19<br>8 | palmitoleic acid                                       | C <sub>16</sub> H <sub>30</sub> O <sub>2</sub>  | 255.2319<br>[M+H] <sup>+</sup>                | 255.2316<br>[M+H] <sup>+</sup>                | -1.01 | long-chain fatty<br>acids and its<br>esters | -    | -    |
| 226 | 22.53<br>2 | oleamide                                               | C <sub>18</sub> H <sub>35</sub> NO              | 282.2791<br>[M+H] <sup>+</sup>                | 282.2789<br>[M+H] <sup>+</sup>                | -0.85 | long-chain fatty<br>acids and its<br>esters | -    | ↑*** |
| 227 | 22.74<br>7 | triligustilides<br>A/B/C or its<br>isomer 4            | C <sub>36</sub> H <sub>42</sub> O <sub>6</sub>  | 588.3320<br>[M+NH <sub>4</sub> ] <sup>+</sup> | 588.3314<br>[M+NH <sub>4</sub> ] <sup>+</sup> | -0.96 | phthalide<br>trimers                        | -    | ↑*** |
| 228 | 23.14<br>1 | triligustilides<br>A/B/C or its<br>isomer 5            | C <sub>36</sub> H <sub>42</sub> O <sub>6</sub>  | 588.3320<br>[M+NH <sub>4</sub> ] <sup>+</sup> | 588.3316<br>[M+NH <sub>4</sub> ] <sup>+</sup> | -0.62 | phthalide<br>trimers                        | -    | ↑*** |
| 229 | 24.58<br>4 | lupenone                                               | C <sub>30</sub> H <sub>48</sub> O               | 425.3778<br>[M+H] <sup>+</sup>                | 425.3777<br>[M+H] <sup>+</sup>                | -0.22 | others                                      | -    | ↑*** |
| 230 | 24.62      | docosaheptaeno<br>i                                    | C <sub>22</sub> H <sub>32</sub> O <sub>2</sub>  | 329.2475                                      | 329.2476                                      | 0.283 | long-chain fatty                            | ↑    | ↑    |

|     |        | c acid                       |                                                | [M+H] <sup>+</sup>          | [M+H] <sup>+</sup>          |       | acids and its eaters                  |   |      |
|-----|--------|------------------------------|------------------------------------------------|-----------------------------|-----------------------------|-------|---------------------------------------|---|------|
| 231 | 25.679 | γ-linolenic acid ethyl ester | C <sub>20</sub> H <sub>34</sub> O <sub>2</sub> | 307.2632 [M+H] <sup>+</sup> | 307.263 [M+H] <sup>+</sup>  | -0.51 | long-chain fatty acids and its eaters | - | ↓*** |
| 232 | 27.595 | α-eleostearic acid           | C <sub>18</sub> H <sub>30</sub> O <sub>2</sub> | 279.2319 [M+H] <sup>+</sup> | 279.2317 [M+H] <sup>+</sup> | -0.56 | long-chain fatty acids and its eaters | - | ↓*** |
| 233 | 27.829 | erucamide                    | C <sub>22</sub> H <sub>43</sub> NO             | 338.3417 [M+H] <sup>+</sup> | 338.3415 [M+H] <sup>+</sup> | -0.71 | long-chain fatty acids and its eaters | - | -    |
| 234 | 28.005 | β-eleostearic acid           | C <sub>18</sub> H <sub>30</sub> O <sub>2</sub> | 279.2319 [M+H] <sup>+</sup> | 279.2318 [M+H] <sup>+</sup> | -0.2  | long-chain fatty acids and its eaters | - | ↓*** |

Notes: Compared with the content of compounds in rhizomes, “↑” means up regulation and “↓” means down regulation; n = 7; \*p < 0.05, \*\*p < 0.01, \*\*\*p < 0.001.

**Table S2** Compounds were characterized in different parts of CX by GC-MS Analysis

| Peak | RT (min) | Mass | Match Score | Name                                                                        | CAS          | Class compound | of | X vs. G | Y vs. G |
|------|----------|------|-------------|-----------------------------------------------------------------------------|--------------|----------------|----|---------|---------|
| 1    | 4.257    | 136  | 93          | α-thujene                                                                   | 002867-05-2  | monoterpenes   |    | ↑**     | -       |
| 2    | 4.399    | 136  | 94          | (+)-α-pinene                                                                | 000080-56-8  | monoterpenes   |    | ↑       | -       |
| 3    | 5.14     | 136  | 96          | sabinene                                                                    | 003387-41-5  | monoterpenes   |    | ↑**     | -       |
| 4    | 5.222    | 136  | 90          | β-pinene                                                                    | 000127-91-3  | monoterpenes   |    | ↑**     | -       |
| 5    | 5.452    | 136  | 97          | β-myrcene                                                                   | 000123-35-3  | monoterpenes   |    | ↑**     | ↓**     |
| 6    | 6.04     | 136  | 96          | (+)-2-carene                                                                | 1000149-94-6 | monoterpenes   |    | ↑**     | ↓**     |
| 7    | 6.222    | 134  | 97          | p-cymene                                                                    | 000099-87-6  | aromatics      |    | ↑**     | ↓**     |
| 8    | 6.322    | 136  | 87          | β-terpinene                                                                 | 000099-84-3  | monoterpenes   |    | ↑**     | ↑*      |
| 9    | 7.016    | 136  | 96          | γ-terpinene                                                                 | 000099-85-4  | monoterpenes   |    | ↑***    | ↓*      |
| 10   | 7.745    | 136  | 98          | α-terpinolene                                                               | 000586-62-9  | monoterpenes   |    | ↑**     | ↓*      |
| 11   | 9.522    | 150  | 91          | 5-pentylcyclohexa-1,3-diene                                                 | 056318-84-4  | olefins        |    | ↑***    | ↓**     |
| 12   | 10.075   | 154  | 97          | (-)-terpinen-4-ol                                                           | 020126-76-5  | monoterpenes   |    | ↑***    | ↓***    |
| 13   | 10.281   | 150  | 91          | p-cymen-8-ol                                                                | 005208-37-7  | alcohols       |    | -       | ↓***    |
| 14   | 13.121   | 184  | 97          | tridecane                                                                   | 000629-50-5  | alkanes        |    | ↑***    |         |
| 15   | 13.533   | 150  | 90          | 2-methoxy-4-vinylphenol                                                     | 007786-61-0  | aromatics      |    | -       | ↓***    |
| 16   | 13.992   | 136  | 91          | 1,5,5-trimethyl-6-methylene-cyclohexene                                     | 000514-95-4  | monoterpenes   |    | -       | ↓***    |
| 17   | 14.316   | 150  | 91          | 1,4-cyclohexadiene-1,2-dicarboxylic anhydride                               | 004773-89-1  | anhydrides     |    | -       | ↑       |
| 18   | 14.374   | 162  | 94          | valerophenone                                                               | 001009-14-9  | ketones        |    | ↓***    | ↓***    |
| 19   | 14.939   | 170  | 90          | (Z)-1-methoxy-4-decene                                                      | 1000333-84-8 | ethers         |    | -       | ↓***    |
| 20   | 15.057   | 204  | 91          | (-)-β-elemene                                                               | 000515-13-9  | sesquiterpenes |    | -       | -       |
| 21   | 15.257   | 178  | 96          | methyleugenol                                                               | 000093-15-2  | ethers         |    | ↓***    | ↓***    |
| 22   | 15.292   | 184  | 90          | dodecanal                                                                   | 000112-54-9  | aldehyde       |    | ↑***    | -       |
| 23   | 15.474   | 204  | 94          | (-)-α-cedrene                                                               | 000546-28-1  | sesquiterpenes |    | ↑***    | -       |
| 24   | 15.569   | 204  | 99          | caryophyllene                                                               | 000087-44-5  | sesquiterpenes |    | ↑*      | ↑***    |
| 25   | 15.651   | 204  | 90          | himachalene-1,4-diene                                                       | 1000412-94-8 | sesquiterpenes |    | ↓***    | ↓***    |
| 26   | 15.768   | 204  | 98          | γ-elemene                                                                   | 029873-99-2  | sesquiterpenes |    | -       | -       |
| 27   | 16.104   | 204  | 96          | (E)-β-eamesene                                                              | 018794-84-8  | sesquiterpenes |    | -       | ↑***    |
| 28   | 16.145   | 204  | 96          | humulene                                                                    | 006753-98-6  | sesquiterpenes |    | -       | ↓***    |
| 29   | 16.416   | 204  | 91          | (3R,3aS,7S,8aR)-3,8,8-trimethyl-6-methyleneoctahydro-1H-3a,7-methanoazulene | 000546-28-1  | sesquiterpenes |    | -       | ↓***    |
| 30   | 16.468   | 204  | 94          | eudesma-4(14),7(11)-diene                                                   | 000515-17-3  | sesquiterpenes |    | -       | -       |
| 31   | 16.58    | 204  | 99          | germacrene D                                                                | 023986-74-5  | sesquiterpenes |    | ↑***    | ↑***    |
| 32   | 16.68    | 204  | 99          | β-selinene                                                                  | 017066-67-0  | sesquiterpenes |    | ↓***    | -       |
| 33   | 16.804   | 204  | 95          | α-selinene                                                                  | 000473-13-2  | sesquiterpenes |    | -       | -       |
| 34   | 16.892   | 204  | 91          | α-farnesene                                                                 | 000502-61-4  | sesquiterpenes |    | -       | ↑***    |
| 35   | 17.063   | 204  | 98          | α-amorphene                                                                 | 000483-75-0  | sesquiterpenes |    | -       | -       |
| 36   | 17.18    | 204  | 98          | δ-amorphene                                                                 | 016729-01-4  | sesquiterpenes |    | ↓***    | ↑***    |
| 37   | 17.704   | 204  | 96          | germacrene B                                                                | 015423-57-1  | sesquiterpenes |    | -       | ↑***    |
| 38   | 17.762   | 220  | 99          | ylangenol                                                                   | 115728-41-1  | sesquiterpenes |    | -       | ↑***    |
| 39   | 18.01    | 220  | 99          | spathulenol                                                                 | 006750-60-3  | sesquiterpenes |    | ↓***    | -       |
| 40   | 18.086   | 220  | 98          | caryophyllene oxide                                                         | 001139-30-6  | sesquiterpenes |    | ↓***    | ↑***    |
| 41   | 18.268   | 222  | 91          | carotol                                                                     | 000465-28-1  | sesquiterpenes |    | -       | -       |
| 42   | 18.321   | 194  | 90          | 1,13-tetradecadiene                                                         | 021964-49-8  | olefins        |    | -       | -       |

|    |        |     |    |                                                      |              |                           |      |      |
|----|--------|-----|----|------------------------------------------------------|--------------|---------------------------|------|------|
| 43 | 18.362 | 222 | 93 | cedrol                                               | 000077-53-2  | sesquiterpenes            | ↓*** | ↓*** |
| 44 | 18.78  | 196 | 98 | hexahydro-3-butylphthalide                           | 003553-34-2  | phthalides                | -    | -    |
| 45 | 18.986 | 190 | 94 | 3-n-butylphthalide                                   | 006066-49-5  | phthalides                | -    | -    |
| 46 | 19.133 | 196 | 96 | cyclotetradecane                                     | 000295-17-0  | alkanes                   | -    | ↓*** |
| 47 | 19.268 | 188 | 98 | Z-butylidenephthalide                                | 072917-31-8  | phthalides                | -    | -    |
| 48 | 19.339 | 192 | 90 | N,N'-diacetyl-1,4-phenylenediamine                   | 000140-50-1  | amide                     | ↓*** | ↓*** |
| 49 | 19.398 | 220 | 92 | 1R,7S,E)-7-isopropyl-4,10-dimethylenecyclodec-5-enol | 081968-62-9  | sesquiterpenes            | -    | ↑*** |
| 50 | 20.06  | 192 | 98 | senkyunolide A                                       | 062006-39-7  | phthalides                | -    | ↓*** |
| 51 | 20.22  | 190 | 99 | Z-ligustilide                                        | 081944-08-3  | phthalides                | -    | -    |
| 52 | 20.333 | 224 | 98 | cetene                                               | 000629-73-2  | olefins                   | -    | ↓*** |
| 53 | 20.598 | 206 | 97 | 3-pentyl-4,5-dihydroisobenzofuran-1(3H)-one          | 128575-99-5  | phthalides                | -    | -    |
| 54 | 20.768 | 190 | 99 | E-ligustilide                                        | 081944-09-4  | phthalides                | -    | -    |
| 55 | 20.98  | 278 | 99 | neophytadiene                                        | 000504-96-1  | olefins                   | -    | ↑*** |
| 56 | 21.056 | 268 | 90 | 6,10,14-trimethylpentadecan-2-one                    | 000502-69-2  | ketones                   | -    | ↑*** |
| 57 | 21.239 | 242 | 95 | pentadecanoic acid                                   | 001002-84-2  | fatty acid and its esters | -    | ↑*** |
| 58 | 21.433 | 224 | 99 | cyclohexadecane                                      | 000295-65-8  | alkanes                   | -    | ↓*** |
| 59 | 21.603 | 264 | 91 | linolenyl alcohol                                    | 000506-44-5  | alcohols                  | -    | ↑**  |
| 60 | 21.892 | 270 | 99 | methyl palmitate                                     | 000112-39-0  | fatty acid and its esters | -    | ↑*** |
| 61 | 22.297 | 256 | 99 | n-hexadecanoic acid                                  | 000057-10-3  | fatty acid and its esters | ↓*** | ↑*** |
| 62 | 22.345 | 278 | 87 | dibutyl phthalate                                    | 1000356-78-4 | anhydrides                | ↑*** | ↑    |
| 63 | 22.574 | 284 | 98 | ethyl palmitate                                      | 000628-97-7  | fatty acid and its esters | ↓*** | -    |
| 64 | 22.621 | 282 | 99 | eicosane                                             | 000112-95-8  | alkanes                   | -    | ↑*** |
| 65 | 23.068 | 224 | 99 | senkyunolide H/I                                     | 094596-27-7  | phthalides                | ↑*** | ↑*   |
| 66 | 23.58  | 296 | 99 | heneicosane                                          | 000629-94-7  | alkanes                   | -    | ↑*** |
| 67 | 23.627 | 296 | 99 | trans-13-octadecenoic acid, methyl ester             | 1000333-61-3 | fatty acid and its esters | -    | ↑*** |
| 68 | 23.762 | 296 | 90 | phytol                                               | 000150-86-7  | alcohols                  | -    | ↑*   |
| 69 | 23.968 | 280 | 99 | linoleic acid                                        | 000060-33-3  | fatty acid and its esters | -    | ↑*** |
| 70 | 24.191 | 308 | 99 | linoleic acid ethyl ester                            | 000544-35-4  | fatty acid and its esters | ↓*** | ↑*** |
| 71 | 24.244 | 310 | 95 | (E)-9-octadecenoic acid ethyl ester                  | 006114-18-7  | fatty acid and its esters | -    | ↑*** |
| 72 | 24.503 | 310 | 94 | docosane                                             | 000629-97-0  | alkanes                   | ↑*** | ↑*** |
| 73 | 25.38  | 282 | 96 | heptadecane                                          | 000112-95-8  | alkanes                   | ↑*** | ↑*** |
| 74 | 25.891 | 336 | 93 | butyl 9,12-octadecadienoate                          | 1000336-54-1 | fatty acid and its esters | -    | ↑*** |
| 75 | 26.221 | 338 | 99 | tetracosane                                          | 000646-31-1  | alkanes                   | -    | ↑*** |

Notes: Compared with the content of compounds in rhizomes, “↑” means up regulation and “↓” means down regulation; n = 7; \*p < 0.05, \*\*p < 0.01, \*\*\*p < 0.001.

**Table S3** Formula list of phthalide monomers

| substituent                            | D = 7                                            | D = 6                                            | D = 5                                            | D = 4                                            | D = 3                                            |
|----------------------------------------|--------------------------------------------------|--------------------------------------------------|--------------------------------------------------|--------------------------------------------------|--------------------------------------------------|
| none                                   | C <sub>12</sub> H <sub>12</sub> O <sub>2</sub> * | C <sub>12</sub> H <sub>14</sub> O <sub>2</sub> * | C <sub>12</sub> H <sub>16</sub> O <sub>2</sub> * | C <sub>12</sub> H <sub>18</sub> O <sub>2</sub> * | C <sub>12</sub> H <sub>12</sub> O <sub>2</sub> * |
| 1 OH                                   | C <sub>12</sub> H <sub>12</sub> O <sub>3</sub> * | C <sub>12</sub> H <sub>14</sub> O <sub>3</sub> * | C <sub>12</sub> H <sub>16</sub> O <sub>3</sub> * | C <sub>12</sub> H <sub>18</sub> O <sub>3</sub> * |                                                  |
| 2 OH                                   | C <sub>12</sub> H <sub>12</sub> O <sub>4</sub> * | C <sub>12</sub> H <sub>14</sub> O <sub>4</sub> * | C <sub>12</sub> H <sub>16</sub> O <sub>4</sub> * | C <sub>12</sub> H <sub>18</sub> O <sub>4</sub> * |                                                  |
| 3 OH                                   | C <sub>12</sub> H <sub>12</sub> O <sub>5</sub>   | C <sub>12</sub> H <sub>14</sub> O <sub>5</sub>   | C <sub>12</sub> H <sub>16</sub> O <sub>5</sub> * | C <sub>12</sub> H <sub>18</sub> O <sub>5</sub> * |                                                  |
| 1 CH <sub>3</sub>                      | C <sub>13</sub> H <sub>14</sub> O <sub>2</sub> * | C <sub>13</sub> H <sub>16</sub> O <sub>2</sub> * | C <sub>13</sub> H <sub>18</sub> O <sub>2</sub>   | C <sub>13</sub> H <sub>20</sub> O <sub>2</sub>   |                                                  |
| 1 OCH <sub>3</sub>                     | C <sub>13</sub> H <sub>14</sub> O <sub>3</sub>   | C <sub>13</sub> H <sub>16</sub> O <sub>3</sub> * | C <sub>13</sub> H <sub>18</sub> O <sub>3</sub> * | C <sub>13</sub> H <sub>20</sub> O <sub>3</sub>   |                                                  |
| 1 OH、1 OCH <sub>3</sub>                | C <sub>13</sub> H <sub>14</sub> O <sub>4</sub>   | C <sub>13</sub> H <sub>16</sub> O <sub>4</sub> * | C <sub>13</sub> H <sub>18</sub> O <sub>4</sub>   | C <sub>13</sub> H <sub>20</sub> O <sub>4</sub> * |                                                  |
| 1 OH、1 OAc                             | C <sub>14</sub> H <sub>14</sub> O <sub>5</sub>   | C <sub>14</sub> H <sub>16</sub> O <sub>5</sub>   | C <sub>14</sub> H <sub>18</sub> O <sub>5</sub> * | C <sub>14</sub> H <sub>20</sub> O <sub>5</sub> * |                                                  |
| 1 OH、1 COC <sub>3</sub> H <sub>7</sub> | C <sub>16</sub> H <sub>18</sub> O <sub>4</sub>   | C <sub>16</sub> H <sub>20</sub> O <sub>4</sub>   | C <sub>16</sub> H <sub>22</sub> O <sub>4</sub> * | C <sub>16</sub> H <sub>24</sub> O <sub>4</sub> * |                                                  |
| 1 OH、1 =O                              | C <sub>12</sub> H <sub>10</sub> O <sub>3</sub>   | C <sub>12</sub> H <sub>12</sub> O <sub>3</sub>   | C <sub>12</sub> H <sub>14</sub> O <sub>3</sub> * | C <sub>12</sub> H <sub>16</sub> O <sub>3</sub> * |                                                  |
| 1 OAng                                 |                                                  | C <sub>17</sub> H <sub>20</sub> O <sub>4</sub> * |                                                  |                                                  |                                                  |

D: degree of unsaturation; \*: phthalides have been found

**Table S4** Formula list of phthalide dimers

| monomers units | I (no | II (1 | III (2 OH) | IV (open | V (open |
|----------------|-------|-------|------------|----------|---------|
|----------------|-------|-------|------------|----------|---------|

|   |                                                         | substituent)                                     | OH )                                             | loop, CH <sub>3</sub> OH)                        | loop, H <sub>2</sub> O)                          |
|---|---------------------------------------------------------|--------------------------------------------------|--------------------------------------------------|--------------------------------------------------|--------------------------------------------------|
| A | n-butylidenephthalide couple with n-butylidenephthalide | C <sub>24</sub> H <sub>24</sub> O <sub>4</sub> * | C <sub>24</sub> H <sub>24</sub> O <sub>5</sub>   | C <sub>24</sub> H <sub>24</sub> O <sub>6</sub>   |                                                  |
| B | n-butylidenephthalide couple with ligustilide           | C <sub>24</sub> H <sub>26</sub> O <sub>4</sub> * | C <sub>24</sub> H <sub>26</sub> O <sub>5</sub>   | C <sub>24</sub> H <sub>26</sub> O <sub>6</sub>   | C <sub>25</sub> H <sub>30</sub> O <sub>5</sub> * |
| C | ligustilide couple with ligustilide                     | C <sub>24</sub> H <sub>28</sub> O <sub>4</sub> * | C <sub>24</sub> H <sub>28</sub> O <sub>5</sub> * | C <sub>24</sub> H <sub>28</sub> O <sub>6</sub>   | C <sub>25</sub> H <sub>32</sub> O <sub>5</sub> * |
| D | ligustilide couple with senkyunolide A                  | C <sub>24</sub> H <sub>30</sub> O <sub>4</sub> * | C <sub>24</sub> H <sub>30</sub> O <sub>5</sub> * | C <sub>24</sub> H <sub>30</sub> O <sub>6</sub> * | C <sub>24</sub> H <sub>30</sub> O <sub>5</sub> * |
| E | ligustilide couple with neosolactone                    | C <sub>24</sub> H <sub>32</sub> O <sub>4</sub> * | C <sub>24</sub> H <sub>32</sub> O <sub>5</sub>   | C <sub>24</sub> H <sub>32</sub> O <sub>6</sub>   |                                                  |
| F | senkyunolide A couple with senkyunolide A               | C <sub>24</sub> H <sub>32</sub> O <sub>4</sub> * | C <sub>24</sub> H <sub>32</sub> O <sub>5</sub> * | C <sub>24</sub> H <sub>32</sub> O <sub>6</sub>   |                                                  |

\*: phthalides have been found

**Table S5** Polymerization sites of phthalide dimers

| polymerization site |       | monomer unit-2                 |                            |                            |                          |           |                              |
|---------------------|-------|--------------------------------|----------------------------|----------------------------|--------------------------|-----------|------------------------------|
|                     |       | 3a/7a                          | 3/8                        | 6/7                        | 3a/6                     | 4/7       | 7/7a                         |
| monomer unit-1      | 3a/7a | 3a.3a',7a.7a'<br>3a.7a',7a.3a' | 3a.8',7a.3'<br>3a.3',7a.8' | 3a.6',7a.7'<br>3a.7',7a.6' |                          |           | 3a.7a',7a.7'<br>3a.7',7a.7a' |
|                     | 3/8   |                                | 3.3',8.8'                  | 3.7',8.6'                  | 3.3a',8.6'<br>3.6',8.3a' |           |                              |
|                     | 6/7   |                                |                            | 6.7',7.6'<br>6.6',7.7'     | 6.6',7.3a'<br>6.3a',7.6' | 6.7',7.4' | 6.7',7.7a'                   |

**Table S6** The percentage of compounds in volatile oils from different parts of CX

| Compounds                 | Rhizome | Fibrous root | Stem and leaf |
|---------------------------|---------|--------------|---------------|
| Sesquiterpenes            | 8.58%   | 5.80%        | 13.79%        |
| Monoterpenes              | 2.29%   | 11.81%       | 0.19%         |
| Phthalides                | 81.13%  | 75.32%       | 71.39%        |
| Alkanes                   | 0.43%   | 0.51%        | 4.00%         |
| Olefins                   | 0.89%   | 2.22%        | 1.52%         |
| Aromatics                 | 0.93%   | 1.43%        | 0.16%         |
| Fatty acid and its esters | 0.47%   | 0.16%        | 3.42%         |
| Alcohols                  | 0.09%   | 0.24%        | 0.01%         |
| Ethers                    | 0.23%   | 0.06%        | 0.00%         |
| Anhydrides                | 0.13%   | 0.60%        | 0.04%         |
| Ketones                   | 0.41%   | 0.21%        | 0.04%         |
| Aldehyde                  | 0.00%   | 0.04%        | 0.00%         |
| Amide                     | 2.87%   | 1.01%        | 0.21%         |
| Total                     | 98.45%  | 99.44%       | 94.77%        |

**Table S7** The normalized peak area of compounds in methanol extracts from different parts of CX

| Compounds                             | Rhizome | Fibrous root | Stem and leaf |
|---------------------------------------|---------|--------------|---------------|
| Amino acids                           | 5.90    | 5.79         | 3.58          |
| Nucleosides                           | 1.90    | 1.27         | 1.06          |
| Phthalide monomers                    | 241.30  | 222.29       | 71.64         |
| Phthalide dimers                      | 14.65   | 17.60        | 17.94         |
| Phthalide trimers                     | 0.02    | 0.03         | 1.58          |
| Phenolic acids                        | 5.68    | 4.86         | 2.53          |
| Flavonoids                            | 0.00    | 0.00         | 0.77          |
| Coumarins                             | 0.19    | 0.30         | 0.22          |
| Phenylethanoid glycosides             | 2.61    | 6.89         | 8.10          |
| Aromatic acids and its esters         | 0.96    | 1.12         | 0.18          |
| Short-chain fatty acids               | 3.33    | 4.96         | 1.74          |
| Long-chain fatty acids and its eaters | 3.24    | 2.75         | 2.91          |
| Saccharides                           | 10.13   | 13.76        | 10.54         |
| Alkaloids                             | 2.30    | 1.97         | 2.55          |
| Others                                | 1.14    | 0.98         | 0.84          |
| Total                                 | 293.36  | 284.56       | 126.19        |
